# Supplementary material for: On the third-order nonlinear optical responses of cis and trans stilbenes – a quantum chemistry investigation
Source: Royal Society of Chemistry journal article supplement (doi:10.1039/d4cp00522h), 2024-01-01
Supplement: d4cp00522h1.pdf [file d4cp00522h1.pdf]

# **On the third-order nonlinear optical responses of *cis* and *trans* stilbene – a quantum chemistry investigation**

Komlanvi Sèvi Kaka,<sup>‡</sup> Frédéric Castet,<sup>‡</sup> and Benoît Champagne<sup>‡,\*</sup>

## **Electronic supplementary information**

## TABLE OF CONTENTS

|                                                                                            | PAGE #         |
|--------------------------------------------------------------------------------------------|----------------|
| <b>1. Complement on third-order NLO responses and measurements</b>                         | <b>S3-S6</b>   |
| <b>2. Structures and energies of trans/cis stilbene</b>                                    | <b>S7-S8</b>   |
| <b>3. Numerical aspects of the calculations: integration grids and Romberg method</b>      | <b>S9-S13</b>  |
| <b>4. Basis set effects on the second hyperpolarizability</b>                              | <b>S14-S16</b> |
| <b>5. Electron correlation effects on the second hyperpolarizabilities</b>                 | <b>S17</b>     |
| <b>6. Selecting an XCF for computing the second hyperpolarizabilities</b>                  | <b>S18</b>     |
| 6.1. Conventional functionals                                                              | <b>S18-S19</b> |
| 6.2. Optimal tuning of the range-separating parameter                                      | <b>S20-S24</b> |
| 6.3. Tuning the HF exchange and the PT2 correlation in B2-BLYP                             | <b>S25-S27</b> |
| 6.4 Delocalization errors with exchange correlation functionals                            | <b>S28-S29</b> |
| <b>7. Solvent effects and frequency dispersion</b>                                         | <b>S30</b>     |
| 7.1. Geometries and thermodynamic data                                                     | <b>S30-S34</b> |
| 7.2. Second hyperpolarizabilities                                                          | <b>S35-S43</b> |
| 7.3. Theoretical and computational aspects on the vibrational second hyperpolarizabilities | <b>S44</b>     |
| 7.4. Linear optical properties                                                             | <b>S44-S46</b> |

# 1. Complement on third-order NLO responses and measurements

(i) **The degenerate four wave-mixing (DFWM).**<sup>S1-4</sup> In this measurement, three beams of frequency  $\omega$  interact in the material and a fourth beam at the same frequency is produced. Two common geometries can be distinguished: a forward-wave geometry in which all the incident beams are propagating in the same direction and a backward-wave geometry (phase conjugation geometry) which corresponds to the usual experimental configuration of DFWM. In the latter, two beams are counterpropagating (one is a forward pump beam and the second is a backward pump beam) and the third beam (a probe beam) is incident at a small angle with respect to the forward pump beam. The generated wave is proportional to the complex conjugate of the third beam's electric field. In DFWM experiment, electronic, reorientation, and vibrational hyperpolarizabilities as well as thermal effects can be measured and their time response can also be obtained.<sup>S1,5</sup> Going to time resolution of femtoseconds is helpful in separating the various contributions. In this experiment, the quantity that can be extracted from the measurements reads:

$$\gamma_{DFWM}(-\omega; \omega, -\omega, \omega) = \gamma_{//}(-\omega; \omega, -\omega, \omega) = \frac{1}{15} \sum_{ij}^{x,y,z} (2\gamma_{iijj} + \gamma_{ijij}) \quad (S1)$$

(ii) **The phase-conjugate interferometry (PCI) experiment** also probes  $\gamma(-\omega; \omega, -\omega, \omega)$ .<sup>S6</sup> In short, the interferometer contains two phase-conjugate mirrors (PCM) based on the DFWM in the retroreflected pump beam configuration. One PCM consists of a cell containing a reference material and the second PCM consists of a cell that contains the organic material to be measured. Using a beam splitter (BS), the two input beams are split into a forward pump (FP) beam and a probe beam. Two retroreflected beams of the FPs by two mirrors serve as backward pump beams (BPs) and recombine together behind the BS. After interaction of the three incident beams with a nonlinear medium placed in each cell/arm, two optical phase-conjugate beams are generated and also combine together at BS. The detail and the optical path of the pump and probe beams can be seen in Figure 1 of Ref. <sup>S6</sup>. Then, the optical path length of one arm of the interferometer is changed with a piezoelectric translator. The two interferograms that arise from the combination of the two retroreflected pump beams and the combination of the two phase-conjugate beams are recorded as a function of the path length. The depth of modulation of the conjugate interferogram is related to the ratio of the amplitude of the third-order susceptibilities of the reference and sample materials. The second hyperpolarizability of organic molecules is thus determined from the measurement performed on a series of the sample solutions at different concentrations. Different nonlinear mechanisms as electronic and orientational effects contribute to the total hyperpolarizabilities in the PCI experiment.

<sup>S6</sup> When the polarizations of the probe and pump are parallel, the second hyperpolarizability quantity reads:

$$\gamma_{PCI}(-\omega; \omega, -\omega, \omega) = \gamma_{//}(-\omega; \omega, -\omega, \omega) = \frac{1}{15} \sum_{ij}^{x,y,z} (\gamma_{ijij} + 2\gamma_{ijji}) \quad (S2)$$

Otherwise, when they are perpendicular, the second hyperpolarizability becomes:<sup>7</sup>

$$\gamma_{PCI}(-\omega; \omega, -\omega, \omega) = \gamma_{\perp}(-\omega; \omega, -\omega, \omega) = \frac{1}{30} \sum_{ij}^{x,y,z} (3\gamma_{iijj} - \gamma_{ijij}) \quad (S3)$$

**(iii) The Kerr experiment.** <sup>S8-10</sup> In this technique, the DC field creates a refractive index difference for the parallel and perpendicular polarization and the measured quantity is the so-called molar Kerr constant, given by: <sup>S11</sup>

$$A_K = \frac{N_A}{81\epsilon_0} \left\{ \gamma^K(-\omega; \omega, 0, 0) + \frac{2\mu\beta^K}{3kT} + \frac{3}{10} \left[ \frac{\sum_{ij}^{x,y,z} \alpha_{ij}\alpha_{ij} - \alpha\alpha}{kT} \right] + \frac{\mu^2(\alpha_{xx} - \alpha)}{(kT)^2} \right\} \quad (S4)$$

where,  $N_A$  is Avogadro's number,  $\beta^K$  is the dc-Pockels first hyperpolarizability [i.e.,  $\beta(-\omega; \omega, 0)$ ],  $\alpha = \frac{1}{3} \sum_i^{x,y,z} \alpha_{ii}$ , is the mean polarizability,  $x$  denotes the space-fixed direction of the applied DC field, and  $\gamma^K$  is the second hyperpolarizability that is actually measured: <sup>S7,12,13</sup>

$$\begin{aligned} \gamma^K(-\omega; \omega, 0, 0) &= \gamma_{dc-Kerr}(-\omega; \omega, 0, 0) = \frac{3}{2} (\gamma_{//}^K - \gamma_{\perp}^K) \\ &= \frac{1}{10} \sum_{ij}^{x,y,z} (3\gamma_{ijij} - \gamma_{iijj}) \end{aligned} \quad (S5)$$

where  $\gamma_{//}^K = \frac{1}{15} \sum_{ij}^{x,y,z} \gamma_{ijij} + 2\gamma_{ijji}$  and  $\gamma_{\perp}^K = \frac{1}{15} \sum_{ij}^{x,y,z} 2\gamma_{iijj} - \gamma_{ijij}$ . In the Kerr experiment, absolute measurements are performed, *i.e.* absolute second hyperpolarizabilities of the sample molecules are determined without calibration with a reference molecule. <sup>S14</sup>

**(iv) The third-harmonic scattering (THS).** <sup>S15,16</sup> In this experiment, a scattered light is detected at the optical frequency  $3\omega$  from an intense laser pulsed at  $\omega$ . The total third-order response reads:

$$\gamma_{THS}(-3\omega; \omega, \omega, \omega) = [\langle \gamma_{ZZZZ}^2 \rangle + \langle \gamma_{ZXXX}^2 \rangle]^{\frac{1}{2}} \quad (S6)$$

where  $\langle \gamma_{ZZZZ}^2 \rangle$  and  $\langle \gamma_{ZXXX}^2 \rangle$  are rotational averages of the  $\gamma$  tensor components. The relationships between these two quantities and the molecular tensor components  $\gamma_{ijkl}$  are determined by the scattering geometry and the polarization state of the fundamental and the harmonic light beams. In common experimental setups, the incident fundamental light beam is propagating along the Y-direction and the scattered light is collected in the X-direction of the laboratory frame. When the incident light is polarized in the Z-direction (vertical geometry) and the scattered light collected using the same polarization, the expressions of the intensity is proportional to  $\langle \gamma_{ZZZZ}^2 \rangle$  whereas when the incident light is polarized in the X-direction (horizontal geometry) and the scattered light remains collected using the vertical polarization, the scattering intensity is proportional to  $\langle \gamma_{ZXXX}^2 \rangle$ . After employing Andrew and Thirunamachandran technique, these two rotational averages read:<sup>S17</sup>

$$\langle \gamma_{ZZZZ}^2 \rangle = \frac{1}{315} \sum_{ijkl}^{x,y,z} \left\{ \begin{array}{l} 2\gamma_{ijkl}^2 + 12\gamma_{iijk}\gamma_{jllk} + 6(\gamma_{iijk}\gamma_{ljjk} + \gamma_{ijkl}\gamma_{jikl}) + \\ 3(\gamma_{ijjk}\gamma_{ikll} + \gamma_{iijj}\gamma_{ikll} + \gamma_{ijjk}\gamma_{klll}) \end{array} \right\} \quad (S7)$$

$$\langle \gamma_{ZXXX}^2 \rangle = \frac{1}{630} \sum_{ijkl}^{x,y,z} \left\{ \begin{array}{l} 16\gamma_{ijkl}^2 + 24\gamma_{ijjk}\gamma_{ikll} - 12\gamma_{iijk}\gamma_{jllk} - \\ 6(\gamma_{iijk}\gamma_{ljjk} + \gamma_{ijkl}\gamma_{jikl}) - 3(\gamma_{iijj}\gamma_{kllk} + \gamma_{iijj}\gamma_{ikll} + \gamma_{ijjk}\gamma_{klll}) \end{array} \right\} \quad (S8)$$

They also define the depolarization ratio:

$$DR_{THS} = \frac{\langle \gamma_{ZZZZ}^2 \rangle}{\langle \gamma_{ZXXX}^2 \rangle} \quad (S9)$$

$DR_{THS}$  takes specific values depending on the symmetry of the molecular moiety that is responsible of the NLO responses. In the static electric field limit (Kleinman symmetry condition), the  $\gamma$  tensor can be decomposed into three multipolar invariants, the isotropic (J=0), the quadrupolar (J=2) and the hexadecapolar (J=4) components:<sup>S18</sup>

$$|\gamma_{J=0}|^2 = \frac{1}{5} \sum_{ijkl}^{x,y,z} \gamma_{iijj}\gamma_{kkll} \quad (S10)$$

$$|\gamma_{J=2}|^2 = \frac{1}{7} \sum_{ijkl}^{x,y,z} (6\gamma_{iijk}\gamma_{jllk} - 2\gamma_{iijj}\gamma_{kkll}) \quad (S11)$$

$$|\gamma_{J=4}|^2 = \frac{1}{35} \sum_{ijkl}^{x,y,z} (35\gamma_{ijkl}^2 - 30\gamma_{iijk}\gamma_{jllk} + 3\gamma_{iijj}\gamma_{kkll}) \quad (S12)$$

Consequently, Eqs. (S7) and (S8) become:

$$\langle \gamma_{ZZZZ}^2 \rangle = \frac{1}{5} |\gamma_{J=0}|^2 + \frac{4}{35} |\gamma_{J=2}|^2 + \frac{8}{315} |\gamma_{J=4}|^2 \quad (\text{S13})$$

$$\langle \gamma_{ZXXX}^2 \rangle = \frac{3}{140} |\gamma_{J=2}|^2 + \frac{1}{63} |\gamma_{J=4}|^2 \quad (\text{S14})$$

Eqs. (S10)-(S12) allow rewriting  $\text{DR}_{THS}$  as:<sup>S19</sup>

$$\text{DR}_{THS} = \frac{32\rho_{4/2}^2 + 235\rho_{0/2}^2 + 144}{20\rho_{4/2}^2 + 27} \quad (\text{S15})$$

where  $\rho_{0/2} = |\gamma_{J=0}|/|\gamma_{J=2}|$  and  $\rho_{4/2} = |\gamma_{J=4}|/|\gamma_{J=2}|$  define the relative contributions of the spherical tensor components to the total third harmonic responses.

## 2. Structures and energies of *trans/cis* stilbenes

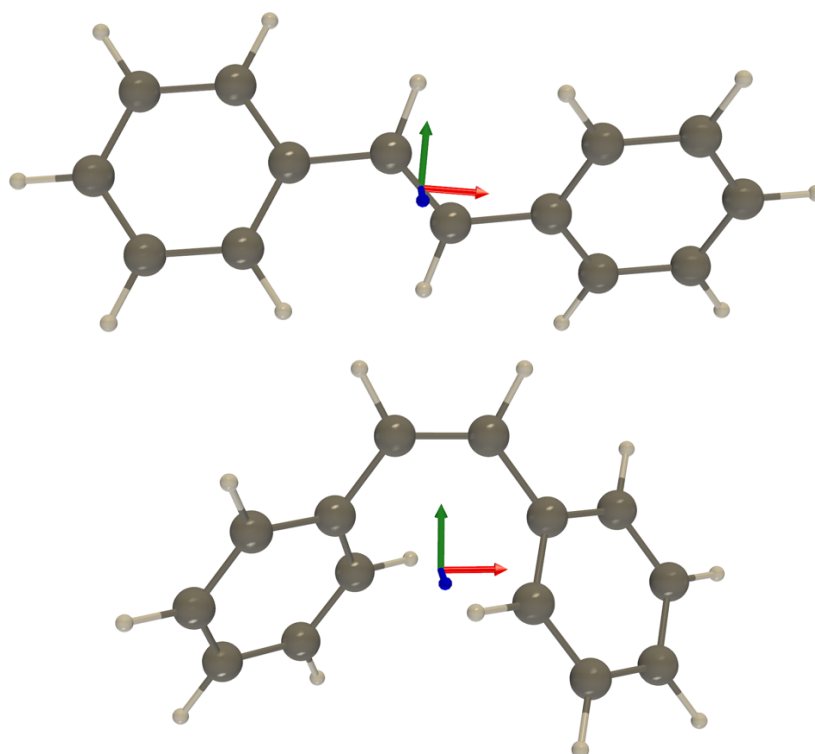

**FIG S1:** Optimized structures of the *trans*- (top) and *cis*-stilbene (bottom) isomers in the Cartesian frame: x-axis (red), y-axis (green) and z-axis (blue).

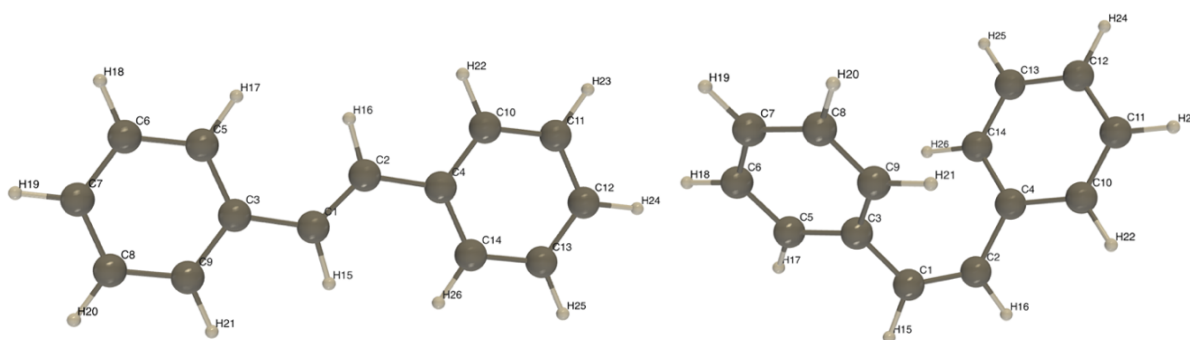

**FIG S2:** Atomic numbering of the *trans*- and *cis*-stilbene isomers

**TABLE S1:** Optimized key geometrical parameters [bond lengths (Å), bond angles (°)] and energies calculated for the *trans*- and *cis*-stilbene, as well as their differences, at the MP2/6-311G(d) level. Enthalpies and free enthalpies were evaluated at 298.15 K for P = 1 atm.

|                                        | <i>trans</i> | <i>cis</i>  | bond length difference,<br>$\Delta = d(t) - d(c)$ |
|----------------------------------------|--------------|-------------|---------------------------------------------------|
| C1—C2                                  | 1.354        | 1.353       | 0.001                                             |
| C2—C4                                  | 1.468        | 1.476       | 0.008                                             |
| C1—C3                                  | 1.468        | 1.476       | 0.008                                             |
| C3—C5                                  | 1.409        | 1.406       | 0.003                                             |
| C5—C6                                  | 1.396        | 1.398       | 0.002                                             |
| C6—C7                                  | 1.400        | 1.399       | 0.001                                             |
| C7—C8                                  | 1.399        | 1.400       | 0.001                                             |
| C8—C9                                  | 1.397        | 1.396       | 0.001                                             |
| C9—C3                                  | 1.408        | 1.408       | 0.000                                             |
| C4—C10                                 | 1.408        | 1.406       | 0.002                                             |
| C10—C11                                | 1.397        | 1.398       | 0.001                                             |
| C11—C12                                | 1.399        | 1.399       | 0.000                                             |
| C12—C13                                | 1.400        | 1.400       | 0.000                                             |
| C13—C14                                | 1.396        | 1.396       | 0.000                                             |
| C14—C4                                 | 1.409        | 1.408       | 0.001                                             |
| C3—C5—C6                               | 120.9        | 120.7       | /                                                 |
| C1—C3—C5                               | 119.5        | 119.9       | /                                                 |
| C2—C1—C3                               | 124.8        | 126.0       | /                                                 |
| C2—C1—C3—C5 (C9)                       | 28.4         | 43.4        | /                                                 |
| C4—C2—C1—C3                            | 179.2        | 5.5         | /                                                 |
| Energy                                 | <i>Trans</i> | <i>Cis</i>  | $\Delta E = E(c) - E(t)$<br>(kcal/mol)            |
| Equilibrium torsional angle (°)        | 28.4         | 43.4        | /                                                 |
| MP2 electronic energy (a.u.)           | -539.079304  | -539.077920 | 0.87                                              |
| MP2 energy + ZPVEs <sup>a</sup> (a.u.) | -538.867194  | -538.865334 | 1.20                                              |
| Enthalpy (H°, a.u.)                    | -538.854361  | -538.852751 | 1.01                                              |
| Free enthalpy (G°, a.u.)               | -538.906264  | -538.904056 | 1.38                                              |

<sup>a</sup> Zero point vibrational energy.



### 3. Numerical aspects of the calculations: integration grids and Romberg method

**TABLE S2.** Static second hyperpolarizabilities (a.u.) of the *trans*- and *cis*-stilbene as obtained at the DFT levels using the 4<sup>th</sup>-order numerical derivative approach with either the **ultrafine** and **superfine** grids. The value in parenthesis reports the relative error (in %) with respect to superfine grid.

| XCFs                         | Ultrafine (99,590) |                |                |                   | Superfine (175/250,974) |               |                |                   |
|------------------------------|--------------------|----------------|----------------|-------------------|-------------------------|---------------|----------------|-------------------|
|                              | $\gamma_{xxxx}$    | $\gamma_{//}$  | $\gamma_{THS}$ | DR <sub>THS</sub> | $\gamma_{xxxx}$         | $\gamma_{//}$ | $\gamma_{THS}$ | DR <sub>THS</sub> |
| <b><i>Trans</i>-stilbene</b> |                    |                |                |                   |                         |               |                |                   |
| <b>B3LYP</b>                 | 612536 (0.00)      | 149071(0.02)   | 228134 (0.01)  | 8.7               | 612530                  | 149040        | 228120         | 8.7               |
| <b>M06</b>                   | 570610 (0.01)      | 136506 (0.03)  | 211477 (0.03)  | 8.5               | 570578                  | 136462        | 211414         | 8.5               |
| <b>M06-2X</b>                | 435464 (0.03)      | 107328 (-0.02) | 162573 (0.03)  | 8.8               | 435330                  | 107348        | 162521         | 8.8               |
| <b>CAM-B3LYP</b>             | 433340 (-0.03)     | 109108 (-0.05) | 162702 (-0.04) | 9.1               | 433464                  | 109161        | 162765         | 9.1               |
| <b><i>Cis</i>-stilbene</b>   |                    |                |                |                   |                         |               |                |                   |
| <b>B3LYP</b>                 | 141268 (0.001)     | 64840 (0.000)  | 73503 (0.001)  | 25.2              | 141074                  | 64826         | 73453          | 25.2              |
| <b>M06</b>                   | 124702 (-0.003)    | 57007 (-0.002) | 65140 (-0.002) | 24.0              | 125108                  | 57108         | 65278          | 24.0              |
| <b>M06-2X</b>                | 97267 (0.003)      | 47163 (-0.030) | 52675 (0.070)  | 28.6              | 97021                   | 47176         | 52636          | 28.6              |
| <b>CAM-B3LYP</b>             | 99057 (-0.001)     | 49902 (-0.050) | 55035 (-0.060) | 31.5              | 99123                   | 49929         | 55070          | 31.5              |

**TABLE S3.** Romberg table of the static  $\gamma_{xxxx}$  (a.u.) of *trans*- (top) and *cis*-stilbene (bottom) calculated from the finite differentiation of  $\mathcal{E}$ . The calculations were performed at the MP2/6-311+G(d) level.

|     | m=0    | m=1    | m=2           | m=3           | m=4    | m=5    | m=6    | m=7    | m=8    |
|-----|--------|--------|---------------|---------------|--------|--------|--------|--------|--------|
| k=0 | 437063 | 436861 | 437055        | 437192        | 437271 | 437312 | 437334 | 437344 | 437350 |
| k=1 | 437264 | 436282 | 436092        | 436015        | 435983 | 435969 | 435963 | 435960 |        |
| k=2 | 438246 | 436851 | <b>436630</b> | <b>436493</b> | 436417 | 436377 | 436357 |        |        |
| k=3 | 439642 | 437513 | <b>437593</b> | 437630        | 437651 | 437662 |        |        |        |
| k=4 | 441771 | 437271 | 437335        | 437319        | 437312 |        |        |        |        |
| k=5 | 446270 | 437079 | 437446        | 437415        |        |        |        |        |        |
| k=6 | 455461 | 435980 | 437656        |               |        |        |        |        |        |
| k=7 | 474942 | 430952 |               |               |        |        |        |        |        |
| k=8 | 518932 |        |               |               |        |        |        |        |        |

$$\rightarrow \gamma_{xxxx} = (437 \pm 1) \times 10^3 \text{ a.u.}$$

|     | m=0    | m=1    | m=2           | m=3           | m=4    | m=5    | m=6    | m=7    | m=8    |
|-----|--------|--------|---------------|---------------|--------|--------|--------|--------|--------|
| k=0 | 106387 | 104281 | 103101        | 102467        | 102138 | 101970 | 101885 | 101842 | 101821 |
| k=1 | 108492 | 107823 | 107538        | 107408        | 107348 | 107320 | 107306 | 107299 |        |
| k=2 | 109161 | 108679 | <b>108443</b> | <b>108306</b> | 108232 | 108193 | 108173 |        |        |
| k=3 | 109643 | 109387 | <b>109404</b> | 109416        | 109423 | 109427 |        |        |        |
| k=4 | 109900 | 109333 | 109322        | 109310        | 109304 |        |        |        |        |
| k=5 | 110467 | 109367 | 109402        | 109399        |        |        |        |        |        |
| k=6 | 111567 | 109263 | 109421        |               |        |        |        |        |        |
| k=7 | 113872 | 108788 |               |               |        |        |        |        |        |
| k=8 | 118955 |        |               |               |        |        |        |        |        |

$$\rightarrow \gamma_{xxxx} = (108 \pm 1) \times 10^3 \text{ a.u.}$$

**TABLE S4.** Romberg table of the static  $\gamma_{xxxx}$  (a.u.) of *trans*-stilbene calculated from the finite differentiation of  $\mathcal{E}$  (top),  $\alpha$  (middle) and  $\beta$  (bottom). The calculations were performed at the CAM-B3LYP/6-311+G(d) level using the **superfine** integration grid.

|     | m=0    | m=1    | m=2           | m=3           | m=4    | m=5    |
|-----|--------|--------|---------------|---------------|--------|--------|
| k=0 | 441105 | 443711 | 444446        | 444634        | 444681 | 444692 |
| k=1 | 433286 | 432686 | 432636        | 432622        | 432619 |        |
| k=2 | 435087 | 433442 | <b>433464</b> | <b>433463</b> |        |        |
| k=3 | 440023 | 433111 | <b>433549</b> |               |        |        |
| k=4 | 460757 | 426546 |               |               |        |        |
| k=5 | 563391 |        |               |               |        |        |

$$\rightarrow \gamma_{xxxx} = (433 \pm 1) \times 10^3 \text{ a.u.}$$

|     | m=0    | m=1    | m=2           | m=3           | m=4    | m=5    |
|-----|--------|--------|---------------|---------------|--------|--------|
| k=0 | 433511 | 433460 | 433460        | 433460        | 433460 | 433460 |
| k=1 | 433664 | 433461 | 433462        | 433462        | 433462 |        |
| k=2 | 434272 | 433456 | <b>433461</b> | <b>433461</b> |        |        |
| k=3 | 436718 | 433385 | <b>433465</b> |               |        |        |
| k=4 | 446717 | 432178 |               |               |        |        |
| k=5 | 490335 |        |               |               |        |        |

$$\rightarrow \gamma_{xxxx} = (433 \pm 1) \times 10^3 \text{ a.u.}$$

|     | m=0    | m=1    | m=2           | m=3           | m=4    | m=5    |
|-----|--------|--------|---------------|---------------|--------|--------|
| k=0 | 433562 | 433460 | 433460        | 433460        | 433460 | 433460 |
| k=1 | 433865 | 433460 | 433460        | 433460        | 433460 |        |
| k=2 | 435083 | 433446 | <b>433461</b> | <b>433460</b> |        |        |
| k=3 | 439994 | 433232 | <b>433480</b> |               |        |        |
| k=4 | 460280 | 429511 |               |               |        |        |
| k=5 | 552584 |        |               |               |        |        |

$$\rightarrow \gamma_{xxxx} = (433 \pm 1) \times 10^3 \text{ a.u.}$$

**TABLE S5.** Romberg table of the static  $\gamma_{xxxx}$  (a.u.) of *cis*-stilbene calculated from the finite differentiation of  $\mathcal{E}$  (top),  $\alpha$  (middle) and  $\beta$  (bottom). The calculations were performed at the CAM-B3LYP/6-311+G(d) level using the **superfine** integration grid.

|     | m=0    | m=1    | m=2          | m=3          | m=4    | m=5    |
|-----|--------|--------|--------------|--------------|--------|--------|
| k=0 | 110613 | 114705 | 115818       | 116102       | 116174 | 116191 |
| k=1 | 98337  | 98007  | 97933        | 97915        | 97910  |        |
| k=2 | 99329  | 99109  | <b>99111</b> | <b>99111</b> |        |        |
| k=3 | 99988  | 99072  | <b>99134</b> |              |        |        |
| k=4 | 102738 | 98141  |              |              |        |        |
| k=5 | 116527 |        |              |              |        |        |

$\rightarrow \gamma_{xxxx} = (99 \pm 1) \times 10^3$  a.u.

|     | m=0    | m=1   | m=2          | m=3          | m=4   | m=5   |
|-----|--------|-------|--------------|--------------|-------|-------|
| k=0 | 991334 | 99129 | 99129        | 99129        | 99130 | 99130 |
| k=1 | 99147  | 99120 | 99120        | 99120        | 99120 |       |
| k=2 | 99229  | 99120 | <b>99121</b> | <b>99121</b> |       |       |
| k=3 | 99554  | 99111 | <b>99121</b> |              |       |       |
| k=4 | 10088  | 98959 |              |              |       |       |
| k=5 | 106656 |       |              |              |       |       |

$\rightarrow \gamma_{xxxx} = (99 \pm 1) \times 10^3$  a.u.

|     | m=0    | m=1   | m=2          | m=3          | m=4   | m=5   |
|-----|--------|-------|--------------|--------------|-------|-------|
| k=0 | 99136  | 99123 | 99123        | 99123        | 99123 | 99123 |
| k=1 | 99177  | 99122 | 99123        | 99123        | 99123 |       |
| k=2 | 99339  | 99121 | <b>99123</b> | <b>99123</b> |       |       |
| k=3 | 99993  | 99095 | <b>99127</b> |              |       |       |
| k=4 | 102686 | 98617 |              |              |       |       |
| k=5 | 114895 |       |              |              |       |       |

$\rightarrow \gamma_{xxxx} = (99 \pm 1) \times 10^3$  a.u.

**TABLE S6.** Second hyperpolarizability (a.u.) of the *trans*-stilbene and *cis*-stilbene molecule calculated from the finite differentiation of  $\mathcal{E}$ ,  $\alpha$  and  $\beta$  with various DFT levels using **superfine** integration grid. The relative errors calculated with respect to the  $\beta$  differentiation are in parenthesis.

|                              | From energy ( $\mathcal{E}$ ) |                       |                   | From alpha $\alpha(0; 0)$ |                       |                   | From beta $\beta(0; 0, 0)$ |                       |                   |
|------------------------------|-------------------------------|-----------------------|-------------------|---------------------------|-----------------------|-------------------|----------------------------|-----------------------|-------------------|
| <b><i>trans</i>-stilbene</b> |                               |                       |                   |                           |                       |                   |                            |                       |                   |
|                              | $\gamma_{//}$                 | $\gamma_{\text{THS}}$ | DR <sub>THS</sub> | $\gamma_{//}$             | $\gamma_{\text{THS}}$ | DR <sub>THS</sub> | $\gamma_{//}$              | $\gamma_{\text{THS}}$ | DR <sub>THS</sub> |
| <b>B3LYP</b>                 | 149040 (-0.01)                | 228120 (-0.010)       | 8.7               | 149054 (-0.003)           | 228124 (-0.003)       | 8.7               | 149059                     | 228132                | 8.7               |
| <b>M06</b>                   | 136462 (-0.01)                | 211414 (-0.050)       | 8.5               | 136461 (-0.010)           | 211491 (-0.013)       | 8.5               | 136469                     | 211520                | 8.5               |
| <b>M06-2X</b>                | 107348 (-0.08)                | 162521 (-0.110)       | 8.8               | 107429 (0.001)            | 162687 (-0.002)       | 8.8               | 107429                     | 162690                | 8.8               |
| <b>CAM-B3LYP</b>             | 109161 (0.008)                | 162765 (0.005)        | 9.1               | 109151 (-0.001)           | 162756 (-0.001)       | 9.1               | 109152                     | 162757                | 9.1               |
| <b><i>cis</i>-stilbene</b>   |                               |                       |                   |                           |                       |                   |                            |                       |                   |
| <b>B3LYP</b>                 | 64826 (-0.03)                 | 73453 (-0.090)        | 25.2              | 64843 (-0.001)            | 73517 (-0.001)        | 25.2              | 64844                      | 73518                 | 25.2              |
| <b>M06</b>                   | 57108 (-0.16)                 | 65278 (-0.360)        | 24.0              | 57212 (0.021)             | 65507 (-0.006)        | 24.0              | 57200                      | 65511                 | 24.0              |
| <b>M06-2X</b>                | 47173 (-0.01)                 | 52635 (-0.170)        | 28.6              | 47195 (0.010)             | 52723 (-0.002)        | 28.3              | 47190                      | 52724                 | 28.3              |
| <b>CAM-B3LYP</b>             | 49929 (-0.02)                 | 55070 (-0.010)        | 31.5              | 49936 (-0.004)            | 55075 (-0.001)        | 31.5              | 49938                      | 55076                 | 31.5              |

## 4. Basis set effects on the second hyperpolarizabilities

**TABLE S7.** Basis set effect on the static second hyperpolarizability ( $10^3$  a.u.) of the *trans*-stilbene molecule. All calculations were performed with the CAM-B3LYP XCF and the superfine grid, using hybrid differentiation schemes with field-dependent polarizabilities evaluated analytically. The values in the squared brackets in the first column correspond to the number of contracted GTOs. Values in parentheses are differences (%) with respect to the reference d-aug-cc-pVTZ results.

| Basis sets           | $\gamma_{xxxx}$ | $\gamma_{//}$ | $\gamma_{THS}$ | $DR_{THS}$ |
|----------------------|-----------------|---------------|----------------|------------|
| 6-31G(d) [234]       | 347 (-21)       | 69 (-37)      | 123 (-26)      | 7.0 (-24)  |
| 6-311G(d) [288]      | 373 (-15)       | 77 (-31)      | 133 (-20)      | 7.4 (-20)  |
| 6-311G(d,p) [324]    | 375 (-15)       | 77 (-30)      | 134 (-19)      | 7.2 (-22)  |
| cc-pVDZ [256]        | 364 (-17)       | 74 (-33)      | 130 (-22)      | 7.1 (-23)  |
| cc-pVTZ [588]        | 382 (-13)       | 80 (-28)      | 137 (-18)      | 7.3 (-21)  |
| cc-pVQZ [1130]       | 394 (-10)       | 85 (-23)      | 143 (-14)      | 7.6 (-17)  |
| <hr/>                |                 |               |                |            |
| 6-31+G(d) [290]      | 443 (1)         | 112 (1)       | 167 (0.2)      | 9.1 (-1)   |
| 6-311+G(d) [344]     | 433 (-1)        | 109 (-2)      | 163 (-2)       | 9.1 (-1)   |
| 6-311+G(d,p) [380]   | 436 (-1)        | 109 (-2)      | 163 (-2)       | 9.0 (-2)   |
| aug-cc-pVDZ [430]    | 435 (-1)        | 110 (-2)      | 163 (-2)       | 9.1 (-1)   |
| aug-cc-pVTZ [920]    | 437 (-1)        | 111 (-1)      | 165 (-1)       | 9.2 (0)    |
| aug-cc-pVQZ [1672]   | 439 (-0.2)      | 112 (0.2)     | 165 (-0.6)     | 9.2 (0)    |
| d-aug-cc-pVDZ [604]  | 440 (0.1)       | 113 (0.9)     | 166 (-0.2)     | 9.3 (1)    |
| d-aug-cc-pVTZ [1252] | 440             | 112           | 166            | 9.2        |

**TABLE S8.** Basis set effect on the static second hyperpolarizability ( $10^3$  a.u.) of the *cis*-stilbene molecule. All calculations were performed with the CAM-B3LYP XCF and the superfine grid, using hybrid differentiation schemes with field-dependent polarizabilities evaluated analytically. The values in the squared brackets in the first column correspond to the number of contracted GTOs. Values in parentheses are differences (%) with respect to the reference d-aug-cc-pVTZ results.

| Basis sets           | $\gamma_{xxxx}$ | $\gamma_{//}$ | $\gamma_{THS}$ | $DR_{THS}$ |
|----------------------|-----------------|---------------|----------------|------------|
| 6-31G(d) [234]       | 59 (-43)        | 20 (-61)      | 27 (-52)       | 11.5 (-63) |
| 6-311G(d) [288]      | 66 (-36)        | 24 (-52)      | 32 (-44)       | 13.7 (-56) |
| 6-311G(d,p) [324]    | 66 (-36)        | 24 (-52)      | 32 (-44)       | 13.6 (-56) |
| cc-pVDZ [256]        | 64 (-39)        | 23 (-56)      | 30 (-47)       | 12.9 (-58) |
| cc-pVTZ [588]        | 69 (-33)        | 26 (-49)      | 33 (-42)       | 14.6 (-53) |
| cc-pVQZ [1130]       | 75 (-28)        | 31 (-41)      | 37 (-34)       | 17.3 (-44) |
| -----                |                 |               |                |            |
| 6-31+G(d) [290]      | 102 (-1)        | 52 (2)        | 57 (1)         | 32.8 (6)   |
| 6-311+G(d) [344]     | 99 (-5)         | 50 (-3)       | 55 (-3)        | 31.5 (2)   |
| 6-311+G(d,p) [380]   | 99 (-4)         | 50 (-3)       | 55 (-3)        | 31.3 (1)   |
| aug-cc-pVDZ [430]    | 102 (-2)        | 51 (-1)       | 56 (-2)        | 31.4 (1)   |
| aug-cc-pVTZ [920]    | 103 (-1)        | 51 (0.1)      | 57 (-0.4)      | 31.2 (0.6) |
| aug-cc-pVQZ [1672]   | 103 (-1)        | 52 (1)        | 57 (0.4)       | 32.8 (6)   |
| d-aug-cc-pVDZ [604]  | 104 (1)         | 53 (3)        | 58 (2)         | 33.3 (7)   |
| d-aug-cc-pVTZ [1252] | 104             | 51            | 57             | 31.0       |

**TABLE S9.** Basis set effect on the  $\gamma(\text{trans})/\gamma(\text{cis})$  ratio of stilbene molecules. All calculations were performed with the CAM-B3LYP XCF and the superfine grid, using hybrid differentiation schemes with field-dependent polarizabilities evaluated analytically. The values in the squared brackets in the first column correspond to the number of contracted GTOs.

| Basis sets                                  | $\gamma_{xxxx}$ | $\gamma_{//}$ | $\gamma_{THS}$ | $DR_{THS}$ |
|---------------------------------------------|-----------------|---------------|----------------|------------|
| 6-31G(d) [234]                              | 5.85            | 3.50          | 4.52           | 0.61       |
| 6-311G(d) [288]                             | 5.60            | 3.16          | 4.22           | 0.54       |
| 6-311G(d,p) [324]                           | 5.64            | 3.17          | 4.24           | 0.53       |
| cc-pVDZ [256]                               | 5.71            | 3.28          | 4.33           | 0.55       |
| cc-pVTZ [588]                               | 5.52            | 3.07          | 4.13           | 0.50       |
| cc-pVQZ [1130]                              | 5.24            | 2.81          | 3.84           | 0.44       |
| <hr style="border-top: 1px dashed black;"/> |                 |               |                |            |
| 6-31+G(d) [290]                             | 4.33            | 2.15          | 2.90           | 0.28       |
| 6-311+G(d) [344]                            | 4.37            | 2.19          | 2.96           | 0.29       |
| 6-311+G(d,p) [380]                          | 4.39            | 2.19          | 2.96           | 0.29       |
| aug-cc-pVDZ [430]                           | 4.26            | 2.16          | 2.92           | 0.29       |
| aug-cc-pVTZ [920]                           | 4.25            | 2.16          | 2.90           | 0.29       |
| aug-cc-pVQZ [1672]                          | 4.26            | 2.15          | 2.90           | 0.28       |
| d-aug-cc-pVDZ [604]                         | 4.21            | 2.13          | 2.87           | 0.28       |
| d-aug-cc-pVTZ [1252]                        | 4.24            | 2.17          | 2.93           | 0.29       |



## 5. Electron correlation effects on the second hyperpolarizabilities

**TABLE S10.** The  $\gamma(\text{trans})/\gamma(\text{cis})$  ratio of stilbene molecules as obtained with wavefunction methods using the 4<sup>th</sup>-order numerical derivative approach and the 6-311+G(d) basis set. The values in the parentheses show the relative error with respect to the CCSD(T) reference values.

| Methods        | $\gamma_{//}$ | $\gamma_{THS}$ | $DR_{THS}$  |
|----------------|---------------|----------------|-------------|
| HF             | 1.96 (-2)     | 2.59 (-2)      | 0.21 (-22)  |
| MP2            | 2.08 (4)      | 2.76 (4)       | 0.28 (4)    |
| MP3            | 2.03 (1)      | 2.67 (1)       | 0.28 (4)    |
| MP4D           | 2.05 (2)      | 2.66 (0)       | 0.30 (11)   |
| MP4DQ          | 2.00 (0)      | 2.61 (-2)      | 0.28 (4)    |
| MP4SDQ         | 2.04 (2)      | 2.70 (2)       | 0.27 (0)    |
| MP4            | 2.11 (5)      | 2.80 (6)       | 0.28 (4)    |
| CCSD           | 1.98 (-1)     | 2.61 (-2)      | 0.26 (-4)   |
| <b>CCSD(T)</b> | <b>2.00</b>   | <b>2.65</b>    | <b>0.27</b> |

## 6. Selecting an XCF for computing the second hyperpolarizabilities

### 6.1. Conventional XCFs

**TABLE S11.**  $\gamma(\text{trans})/\gamma(\text{cis})$  ratios of the static second hyperpolarizability of the stilbene molecule, as obtained using various DFT XCFs and the 2<sup>nd</sup> order numerical derivative approach. All calculations were performed using the 6-311+G(d) basis set and the superfine grid. The values in parentheses show the relative error with respect to the CCSD(T)/6-311+G(d) reference values (last line), obtained using the 4<sup>th</sup> order numerical derivative approach.

| XCFs             | $\gamma_{//}$ | $\gamma_{THS}$ | $DR_{THS}$  |
|------------------|---------------|----------------|-------------|
| SVWN             | 2.37 (19)     | 3.15 (19)      | 0.41 (52)   |
| BLYP             | 2.31 (16)     | 3.09 (17)      | 0.38 (41)   |
| PBE              | 2.33 (17)     | 3.12 (18)      | 0.39 (44)   |
| B97-D            | 2.33 (17)     | 3.12 (18)      | 0.39 (44)   |
| M06-L            | 2.62 (31)     | 3.51 (32)      | 0.43 (59)   |
| B3LYP            | 2.30 (15)     | 3.10 (17)      | 0.35 (30)   |
| PBE0             | 2.31 (16)     | 3.13 (18)      | 0.34 (26)   |
| M06              | 2.39 (20)     | 3.23 (22)      | 0.36 (33)   |
| M06-2X           | 2.28 (14)     | 3.09 (17)      | 0.31 (15)   |
| M06-HF           | 2.03 (1)      | 2.72 (3)       | 0.25 (-7)   |
| M11              | 2.24 (12)     | 3.05 (15)      | 0.30 (11)   |
| MN15             | 2.24 (12)     | 3.02 (14)      | 0.31 (15)   |
| $\omega$ B97     | 2.12 (6)      | 2.85 (8)       | 0.26 (-4)   |
| $\omega$ B97X    | 2.08 (4)      | 2.78 (5)       | 0.26 (-4)   |
| $\omega$ B97X-D  | 2.11 (5)      | 2.82 (6)       | 0.29 (7)    |
| LC- $\omega$ PBE | 2.18 (9)      | 2.95 (11)      | 0.27 (0)    |
| CAM-B3LYP        | 2.19 (10)     | 2.95 (11)      | 0.29 (7)    |
| LC-BLYP          | 2.12 (6)      | 2.87 (8)       | 0.25 (-7)   |
| PBE0DH           | 2.49 (25)     | 3.45 (30)      | 0.25 (-7)   |
| mPW2PLYP         | 2.24 (12)     | 3.03 (14)      | 0.31 (15)   |
| B2-PLYP          | 2.24 (12)     | 3.03 (14)      | 0.31 (15)   |
| <b>CCSD(T)</b>   | <b>2.00</b>   | <b>2.65</b>    | <b>0.27</b> |

**TABLE S12.** Isotropic ( $J = 0$ ), quadrupolar ( $J = 2$ ), and hexadecapolar ( $J = 4$ ) components to the second hyperpolarizability calculated at different levels of approximation using the superfine integration grid.

| <b>Methods</b>         | <b>(<math>J = 0</math>) (a.u.)</b> | <b>(<math>J = 2</math>) (a.u.)</b> | <b>(<math>J = 4</math>) (a.u.)</b> |
|------------------------|------------------------------------|------------------------------------|------------------------------------|
| <i>trans</i> -stilbene |                                    |                                    |                                    |
| <b>SVWN</b>            | 407750                             | 564620                             | 342270                             |
| <b>B3LYP</b>           | 333302                             | 444805                             | 268449                             |
| <b>M06-2X</b>          | 240215                             | 314572                             | 190429                             |
| <b>CAM-B3LYP</b>       | 241346                             | 306332                             | 185226                             |
| <b>LC-BLYP</b>         | 181940                             | 224305                             | 136972                             |
| <b>HF</b>              | 166961                             | 191249                             | 117870                             |
| <b>MP2</b>             | 258697                             | 312586                             | 177672                             |
| <b>CCSD(T)</b>         | 241259                             | 287852                             | 163316                             |
| <i>cis</i> -stilbene   |                                    |                                    |                                    |
| <b>SVWN</b>            | 172474                             | 124236                             | 55492                              |
| <b>B3LYP</b>           | 144992                             | 91130                              | 42088                              |
| <b>M06-2X</b>          | 105531                             | 61810                              | 28635                              |
| <b>CAM-B3LYP</b>       | 111660                             | 60935                              | 29408                              |
| <b>LC-BLYP</b>         | 85814                              | 42294                              | 21539                              |
| <b>HF</b>              | 85355                              | 34644                              | 21254                              |
| <b>MP2</b>             | 123706                             | 64259                              | 29660                              |
| <b>CCSD(T)</b>         | 120151                             | 60864                              | 26467                              |

## 6.2. Optimal tuning of the range-separating parameter

The range-separating parameters  $\mu$  were optimized by imposing that the Koopmans theorem for the first ionization energy is satisfied. In that case, the following function,  $\Delta_{\text{IP}}(\mu)$  must be as close as possible to zero:

$$\Delta_{\text{IP}}(\mu) = \varepsilon_{\text{HOMO}}^{\text{N}}(\mu) - [(\mathcal{E}(\mu, N) - \mathcal{E}(\mu, N - 1))] \quad (\text{S16})$$

with  $\varepsilon_{\text{HOMO}}^{\text{N}}$ , the energy of the HOMO of the N-electron system and  $\mathcal{E}(N)$  and  $\mathcal{E}(N - 1)$  the total ground state energies of the systems with N and N-1 electrons. In this work,  $\mu$  was varied in the gas phase for the LC-BLYP, CAM-B3LYP and  $\omega$ B97 XCFs to monitor the  $\Delta_{\text{IP}}(\mu)$  function (Table S13). Since it is known that functionals that are tuned in this manner also tend to lead to a smaller Kohn-Sham delocalization error (DE) or self-interaction error (with more reliable predictions of properties that are sensitive to the DE), the performance of DFT functionals were also rationalized by analyzing their DE. Note that the DE manifests in a curvature of  $\mathcal{E}(N)$  versus N between integer  $N^{\text{S20}}$  as defined through the following expression: <sup>S21</sup>

$$\begin{aligned} \Delta\mathcal{E}(\delta) &= \Delta\mathcal{E}\delta + \{[(\varepsilon_{\text{LUMO}}^{\text{N}} - \Delta\mathcal{E})(1 - \delta) + (\Delta\mathcal{E} - \varepsilon_{\text{HOMO}}^{\text{N+1}})\delta]\delta(1 - \delta)\} \\ &= \Delta\mathcal{E}\delta + \Delta\Delta\mathcal{E}(\delta) \end{aligned} \quad (\text{S17})$$

where  $\delta \in [0, 1]$  defines the number of electrons that is added or removed from the system and  $\Delta\mathcal{E} = \mathcal{E}(N + 1) - \mathcal{E}(N)$ .  $\varepsilon_{\text{LUMO}}^{\text{N}}$  ( $\varepsilon_{\text{HOMO}}^{\text{N+1}}$ ) is the energy of the LUMO (HOMO) of the N (N+1)-electron system and  $\Delta\Delta\mathcal{E}(\delta)$  related to the expression in the curly brackets, defines the deviation with respect to the linear behavior in  $\delta$ , as described by  $\Delta\mathcal{E}\delta$ . Eq. (S17) has already been employed to quantify the localization and delocalization errors at the HF and DFT levels. <sup>S20,22–24</sup> While the  $\mu$ -tuning scheme of eq. S16 has been demonstrated to offer the possibility to describe accurately the molecular responses to electric fields, <sup>S25,26</sup> some controversial conclusions were also reported <sup>S27,28</sup> leading to a new tuning procedure definition proposed by Besalú-Sala *et al.* <sup>S29</sup>,  $T_{\alpha}$ -LC-BLYP dedicated specifically to the calculation of second hyperpolarizabilities. The details of the procedure can be found in Ref. <sup>S29</sup>

**TABLE S13.** Ionization energy calculated for *trans*-stilbene and *cis*-stilbene molecules by tuning the range-separated parameter  $\mu$  in view of satisfying Koopmans' theorem.

| $\mu$ (bohr <sup>-1</sup> )   | $\epsilon_{\text{HOMO}}^{\text{N}}$ (eV) | $\mathcal{E}(\mu, \text{N})$ (a.u.) | $\mathcal{E}(\mu, \text{N} - 1)$ (a.u.) | $\Delta_{\text{IP}}(\mu)$ (eV) |
|-------------------------------|------------------------------------------|-------------------------------------|-----------------------------------------|--------------------------------|
| <b><i>trans</i>-stilbene</b>  |                                          |                                     |                                         |                                |
| <b>LC-BLYP</b>                |                                          |                                     |                                         |                                |
| 0.48                          | -8.589                                   | -539.1096551                        | -538.8167815                            | -0.620                         |
| 0.47                          | -8.573                                   | -539.1206672                        | -538.8278971                            | -0.606                         |
| 0.40                          | -8.424                                   | -539.2011886                        | -538.9098811                            | -0.497                         |
| 0.33                          | -8.193                                   | -539.2904914                        | -539.0022598                            | -0.350                         |
| 0.26                          | -7.846                                   | -539.3975261                        | -539.1144043                            | -0.142                         |
| 0.19                          | -7.338                                   | -539.5422019                        | -539.2665425                            | 0.163                          |
| 0.12                          | -6.652                                   | -539.7645902                        | -539.4971650                            | 0.625                          |
| 0.10                          | -6.419                                   | -539.8518517                        | -539.5866113                            | 0.798                          |
| 0.05                          | -5.754                                   | -540.1331380                        | -539.8704300                            | 1.395                          |
| <b><math>\omega</math>B97</b> |                                          |                                     |                                         |                                |
| 0.48                          | -8.541                                   | -540.6346695                        | -540.3447030                            | -0.651                         |
| 0.40                          | -8.359                                   | -540.6990360                        | -540.4112344                            | -0.528                         |
| 0.33                          | -8.108                                   | -540.7570917                        | -540.4730569                            | -0.379                         |
| 0.30                          | -7.965                                   | -540.7841221                        | -540.5023903                            | -0.299                         |
| 0.28                          | -7.856                                   | -540.8035719                        | -540.5236374                            | -0.239                         |
| 0.19                          | -7.186                                   | -540.9205530                        | -540.6515587                            | 0.134                          |
| 0.12                          | -6.417                                   | -541.0841752                        | -540.8264683                            | 0.595                          |
| 0.10                          | -6.153                                   | -541.1527521                        | -540.8983407                            | 0.770                          |
| 0.05                          | -5.420                                   | -541.3912695                        | -541.1435947                            | 1.319                          |
| <b>CAM-B3LYP</b>              |                                          |                                     |                                         |                                |
| 0.48                          | -7.363                                   | -540.4159933                        | -540.1331998                            | 0.332                          |
| 0.40                          | -7.291                                   | -540.4579546                        | -540.1759664                            | 0.382                          |
| 0.33                          | -7.188                                   | -540.4988590                        | -540.2183291                            | 0.445                          |
| 0.26                          | -7.031                                   | -540.5479484                        | -540.2698202                            | 0.537                          |
| 0.19                          | -6.787                                   | -540.6143830                        | -540.3401798                            | 0.674                          |
| 0.12                          | -6.477                                   | -540.7167578                        | -540.4460470                            | 0.889                          |
| 0.10                          | -6.368                                   | -540.7569300                        | -540.4872097                            | 0.971                          |
| 0.05                          | -6.056                                   | -540.8902370                        | -540.6224590                            | 1.231                          |

| <i>cis-stilbene</i>           |        |              |              |        |
|-------------------------------|--------|--------------|--------------|--------|
| <b>LC-BLYP</b>                |        |              |              |        |
| 0.48                          | -8.826 | -539.1050985 | -538.8017925 | -0.573 |
| 0.47                          | -8.809 | -539.1161162 | -538.8130085 | -0.561 |
| 0.40                          | -8.650 | -539.1966645 | -538.8957214 | -0.461 |
| 0.33                          | -8.409 | -539.2859614 | -538.9888446 | -0.324 |
| 0.26                          | -8.051 | -539.3929212 | -539.1016471 | -0.125 |
| 0.19                          | -7.534 | -539.5373450 | -539.2540084 | 0.176  |
| 0.12                          | -6.813 | -539.7590784 | -539.4849147 | 0.647  |
| 0.10                          | -6.566 | -539.8460407 | -539.5743355 | 0.827  |
| 0.05                          | -5.873 | -540.1347072 | -539.8675105 | 1.398  |
| <b><math>\omega</math>B97</b> |        |              |              |        |
| 0.48                          | -8.761 | -540.6310765 | -540.3311398 | -0.599 |
| 0.40                          | -8.569 | -540.6953944 | -540.3983756 | -0.487 |
| 0.33                          | -8.309 | -540.7533397 | -540.4608224 | -0.349 |
| 0.30                          | -8.161 | -540.7802895 | -540.4904003 | -0.273 |
| 0.26                          | -7.923 | -540.8206749 | -540.5350242 | -0.150 |
| 0.19                          | -7.367 | -540.9160729 | -540.6399213 | 0.147  |
| 0.12                          | -6.584 | -541.0787228 | -540.8139725 | 0.620  |
| 0.05                          | -5.588 | -541.3844798 | -541.1288047 | 1.369  |
| <b>CAM-B3LYP</b>              |        |              |              |        |
| 0.48                          | -7.607 | -540.4101832 | -540.1169602 | 0.372  |
| 0.40                          | -7.528 | -540.4521503 | -540.1600982 | 0.419  |
| 0.33                          | -7.419 | -540.4930316 | -540.2028040 | 0.478  |
| 0.30                          | -7.356 | -540.5126578 | -540.2234928 | 0.512  |
| 0.26                          | -7.255 | -540.5420498 | -540.2545914 | 0.567  |
| 0.19                          | -7.016 | -540.6083692 | -540.3246811 | 0.703  |
| 0.12                          | -6.679 | -540.7103776 | -540.4310186 | 0.923  |
| 0.05                          | -6.243 | -540.8833412 | -540.6071157 | 1.273  |

**TABLE S14.** Static second hyperpolarizability ( $10^3$  a.u.) as a function of the range-separating parameter ( $\mu$ ) for the *trans*-stilbene molecule.

| $\mu$ (bohr <sup>-1</sup> )   | $\gamma_{//}$ | $\gamma_{THS}$ | $DR_{THS}$ |
|-------------------------------|---------------|----------------|------------|
| <b><math>\omega</math>B97</b> |               |                |            |
| 0.05                          | 169.2 (57)    | 264.0 (70)     | 8.4 (-15)  |
| 0.12                          | 144.4 (34)    | 217.9 (40)     | 8.8 (-11)  |
| 0.19                          | 120.7 (12)    | 178.1 (14)     | 9.3 (-6)   |
| 0.22                          | 112.7 (4)     | 165.4 (7)      | 9.3 (-6)   |
| 0.28                          | 100.1 (-7)    | 146.2 (-6)     | 9.4 (-5)   |
| 0.30                          | 96.8 (-10)    | 141.3 (-9)     | 9.4 (-5)   |
| 0.33                          | 92.5 (-14)    | 135.0 (-13)    | 9.4 (-5)   |
| 0.40                          | 84.8 (-21)    | 123.7 (-20)    | 9.4 (-5)   |
| 0.48                          | 78.9 (-27)    | 115.2 (-26)    | 9.4 (-5)   |
| <b>CAM-B3LYP</b>              |               |                |            |
| 0.05                          | 149.5 (38)    | 228.0 (47)     | 8.7 (-12)  |
| 0.12                          | 138.0 (28)    | 208.2 (34)     | 8.9 (-10)  |
| 0.19                          | 125.2 (16)    | 187.4 (21)     | 9.0 (-9)   |
| 0.28                          | 113.5 (5)     | 169.4 (9)      | 9.1 (-8)   |
| 0.33                          | 109.1 (1)     | 162.7 (5)      | 9.1 (-8)   |
| 0.40                          | 104.6 (-3)    | 155.9 (0.6)    | 9.1 (-8)   |
| 0.48                          | 100.9 (-6)    | 150.5 (-3)     | 9.1 (-8)   |
| <b>LC-BLYP</b>                |               |                |            |
| 0.47                          | 81.4 (-25)    | 119.3 (-23)    | 9.3 (-6)   |
| 0.40                          | 86.9 (-19)    | 127.3 (-18)    | 9.3 (-6)   |
| 0.33                          | 96.0 (-12)    | 139.4 (-10)    | 9.4 (-5)   |
| 0.30                          | 99.7 (-8)     | 146.3 (-6)     | 9.3 (-6)   |
| 0.26                          | 107.5 (-0.5)  | 157.8 (2)      | 9.3 (-6)   |
| 0.23                          | 115.0 (6)     | 169.0 (9)      | 9.3 (-6)   |
| 0.19                          | 126.5 (17)    | 187.0 (21)     | 9.2 (-7)   |
| 0.12                          | 154.9 (43)    | 232.5 (50)     | 9.0 (-9)   |
| 0.10                          | 164.6 (52)    | 248.6 (60)     | 8.9 (-10)  |
| 0.05                          | 185.8 (72)    | 285.6 (84)     | 8.6 (-13)  |
| <b>CCSD(T)</b>                | <b>108.0</b>  | <b>155.0</b>   | <b>9.9</b> |

**TABLE S15.** Static second hyperpolarizability ( $10^3$  a.u.) as a function of the range-separating parameter ( $\mu$ ) for the *cis*-stilbene molecule.

| XCFs                                 | $\gamma_{  }$ | $\gamma_{\text{THS}}$ | $\text{DR}_{\text{THS}}$ |
|--------------------------------------|---------------|-----------------------|--------------------------|
| <b><math>\omega\text{B97}</math></b> |               |                       |                          |
| 0.05                                 | 70.4 (30)     | 82.3 (41)             | 21.0 (-43)               |
| 0.12                                 | 65.7 (22)     | 74.3 (27)             | 25.9 (-30)               |
| 0.19                                 | 57.0 (6)      | 63.0 (8)              | 31.3 (-15)               |
| 0.22                                 | 56.4 (4)      | 61.9 (6)              | 33.0 (-10)               |
| 0.26                                 | 49.4 (-8)     | 54.0 (-8)             | 35.5 (-3)                |
| 0.30                                 | 46.0 (-15)    | 50.2 (-14)            | 35.5 (-3)                |
| 0.33                                 | 43.9 (-19)    | 47.7 (-18)            | 36.0 (-2)                |
| 0.40                                 | 40.0 (-26)    | 43.4 (-26)            | 36.7 (-0.3)              |
| 0.48                                 | 37.0 (-31)    | 40.2 (-31)            | 37.2 (1)                 |
| <b>CAM-B3LYP</b>                     |               |                       |                          |
| 0.05                                 | 65.9 (22)     | 74.5 (27)             | 25.6 (-30)               |
| 0.12                                 | 62.7 (16)     | 70.3 (20)             | 27.6 (-25)               |
| 0.19                                 | 57.6 (7)      | 64.0 (9)              | 29.6 (-19)               |
| 0.26                                 | 53.2 (-1)     | 58.8 (0.5)            | 30.8 (-16)               |
| 0.30                                 | 51.2 (-5)     | 56.5 (-3)             | 31.3 (-15)               |
| 0.33                                 | 49.9 (-8)     | 55.1 (-6)             | 31.5 (-14)               |
| 0.40                                 | 47.7 (-11)    | 52.5 (-10)            | 31.9 (-13)               |
| 0.48                                 | 45.9 (-15)    | 50.5 (-14)            | 32.2 (-12)               |
| <b>LC-BLYP</b>                       |               |                       |                          |
| 0.47                                 | 38.4 (-29)    | 41.6 (-29)            | 36.9 (0.3)               |
| 0.40                                 | 41.1 (-24)    | 44.7 (-24)            | 36.4 (-1)                |
| 0.33                                 | 45.2 (-16)    | 49.3 (-16)            | 35.6 (-3)                |
| 0.30                                 | 47.6 (-12)    | 51.9 (-11)            | 35.1 (-5)                |
| 0.26                                 | 51.5 (-5)     | 56.3 (-4)             | 34.2 (-7)                |
| 0.23                                 | 55.0 (2)      | 60.4 (3)              | 33.3 (-9)                |
| 0.19                                 | 60.8 (13)     | 67.1 (15)             | 31.5 (-14)               |
| 0.12                                 | 73.4 (36)     | 82.4 (41)             | 27.1 (-26)               |
| 0.10                                 | 77.0 (43)     | 87.1 (49)             | 25.7 (-30)               |
| 0.05                                 | 82.8 (53)     | 95.3 (63)             | 22.9 (-38)               |
| <b>CCSD(T)</b>                       | <b>54.0</b>   | <b>58.5</b>           | <b>36.8</b>              |



### 6.3. Tuning the HF exchange and the PT2 correlation in B2-BLYP

**TABLE S16.** B2-PLYP/6-311+G(d) static second hyperpolarizabilities ( $10^3$  a.u.) of *trans*-stilbene as a function of the percentage of PT2 correlation (for a percentage of HF exchange fixed at 53%) and as a function of the percentage of HF exchange (for a percentage of PT2 correlation fixed at 27%). The values in parentheses are the relative errors in % with respect to the reference CCSD(T) values.

| % PT2 | $\gamma_{//}$ | $\gamma_{THS}$ | $DR_{THS}$ |
|-------|---------------|----------------|------------|
| 0     | 105.0 (-3)    | 156.0 (1)      | 9.1 (-8)   |
| 5     | 110.6 (2)     | 165.1 (7)      | 9.0 (-9)   |
| 10    | 116.1 (7)     | 173.8 (12)     | 9.0 (-9)   |
| 15    | 121.7 (13)    | 182.4 (18)     | 9.0 (-9)   |
| 20    | 127.2 (18)    | 191.1 (23)     | 9.0 (-9)   |
| 25    | 132.9 (23)    | 200.0 (29)     | 9.0 (-9)   |
| 35    | 144.2 (34)    | 217.5 (40)     | 8.9 (-10)  |
| 45    | 155.8 (44)    | 235.3 (52)     | 8.9 (-10)  |
| 55    | 167.4 (55)    | 253.3 (63)     | 8.9 (-10)  |
| 65    | 179.3 (66)    | 271.5 (75)     | 8.9 (-10)  |
| 75    | 191.3 (77)    | 290.0 (87)     | 8.9 (-10)  |
| 85    | 203.5 (88)    | 308.5 (99)     | 8.9 (-10)  |
| 90    | 209.7 (94)    | 317.8 (105)    | 8.9 (-10)  |
| 100   | 222.2 (106)   | 336.7 (117)    | 8.9 (-10)  |
| % HF  | $\gamma_{//}$ | $\gamma_{THS}$ | $DR_{THS}$ |
| 0     | 324.3 (200)   | 512.3 (231)    | 8.3 (-16)  |
| 10    | 264.1 (145)   | 413.3 (167)    | 8.4 (-15)  |
| 15    | 240.7 (123)   | 374.8 (142)    | 8.5 (-14)  |
| 20    | 220.4 (104)   | 341.7 (120)    | 8.5 (-14)  |
| 27    | 196.3 (82)    | 302.4 (95)     | 8.6 (-13)  |
| 37    | 168.4 (56)    | 257.1 (66)     | 8.7 (-12)  |
| 47    | 146.3 (35)    | 221.4 (43)     | 8.9 (-10)  |
| 55    | 131.7 (22)    | 198.0 (28)     | 9.0 (-9)   |
| 60    | 123.7 (15)    | 185.1 (19)     | 9.0 (-9)   |
| 70    | 110.0 (2)     | 163.1 (5)      | 9.2 (-7)   |
| 80    | 98.5 (-9)     | 144.9 (-7)     | 9.3 (-6)   |
| 100   | 80.7 (-25)    | 117.0 (-25)    | 9.6 (-3)   |

**TABLE S17.** B2-PLYP/6-311+G(d) static second hyperpolarizabilities ( $10^3$  a.u.) of *cis*-stilbene as a function of the percentage of PT2 correlation (for a percentage of HF exchange fixed at 53%) and as a function of the percentage of HF exchange (for a percentage of PT2 correlation fixed at 27%). The values in parentheses are the relative errors in % with respect to the reference CCSD(T) values.

| <b>% PT2</b> | <b><math>\gamma_{//}</math></b> | <b><math>\gamma_{THS}</math></b> | <b><math>DR_{THS}</math></b> |
|--------------|---------------------------------|----------------------------------|------------------------------|
| 0            | 48.0 (-11)                      | 52.8 (-10)                       | 32.1 (-13)                   |
| 10           | 52.4 (-3)                       | 58.0 (-1)                        | 30.6 (-17)                   |
| 15           | 54.7 (1)                        | 60.6 (4)                         | 30.1 (-18)                   |
| 20           | 57.0 (6)                        | 63.3 (8)                         | 29.5 (-20)                   |
| 25           | 59.3 (10)                       | 66.0 (13)                        | 29.1 (-21)                   |
| 35           | 64.0 (19)                       | 71.5 (22)                        | 28.3 (-23)                   |
| 45           | 68.8 (27)                       | 77.1 (32)                        | 27.5 (-26)                   |
| 55           | 73.8 (37)                       | 82.8 (42)                        | 27.3 (-27)                   |
| 65           | 78.9 (46)                       | 88.7 (52)                        | 26.9 (-27)                   |
| 75           | 84.1 (56)                       | 94.7 (62)                        | 26.7 (-28)                   |
| 85           | 89.5 (66)                       | 100.9 (72)                       | 26.5 (-28)                   |
| 90           | 92.2 (71)                       | 104.0 (78)                       | 26.4 (-29)                   |
| 100          | 97.8 (81)                       | 110.4 (89)                       | 26.3                         |
| <b>% HF</b>  | <b><math>\gamma_{//}</math></b> | <b><math>\gamma_{THS}</math></b> | <b><math>DR_{THS}</math></b> |
| 0            | 132.8 (146)                     | 158.5 (171)                      | 18.7 (-49)                   |
| 10           | 109.6 (103)                     | 128.5 (120)                      | 20.5 (-44)                   |
| 15           | 100.6 (86)                      | 117.0 (100)                      | 21.4 (-42)                   |
| 20           | 92.8 (72)                       | 107.2 (83)                       | 22.4 (-39)                   |
| 27           | 83.6 (55)                       | 95.7 (64)                        | 23.7 (-36)                   |
| 37           | 72.9 (35)                       | 82.5 (41)                        | 25.7 (-30)                   |
| 47           | 64.5 (19)                       | 72.2 (23)                        | 27.7 (-25)                   |
| 53           | 60.2 (11)                       | 67.1 (15)                        | 28.9 (-21)                   |
| 60           | 55.8 (3)                        | 61.8 (6)                         | 30.4 (-17)                   |
| 70           | 50.5 (-6)                       | 55.5 (-5)                        | 32.5 (-12)                   |
| 80           | 46.0 (-15)                      | 50.2 (-14)                       | 34.6 (-6)                    |
| 90           | 42.1 (-22)                      | 45.8 (-22)                       | 36.8 (0)                     |
| 100          | 31.8 (-41)                      | 42.0 (-28)                       | 39.0 (6)                     |

## 6.4. Delocalization errors with exchange correlation functionals

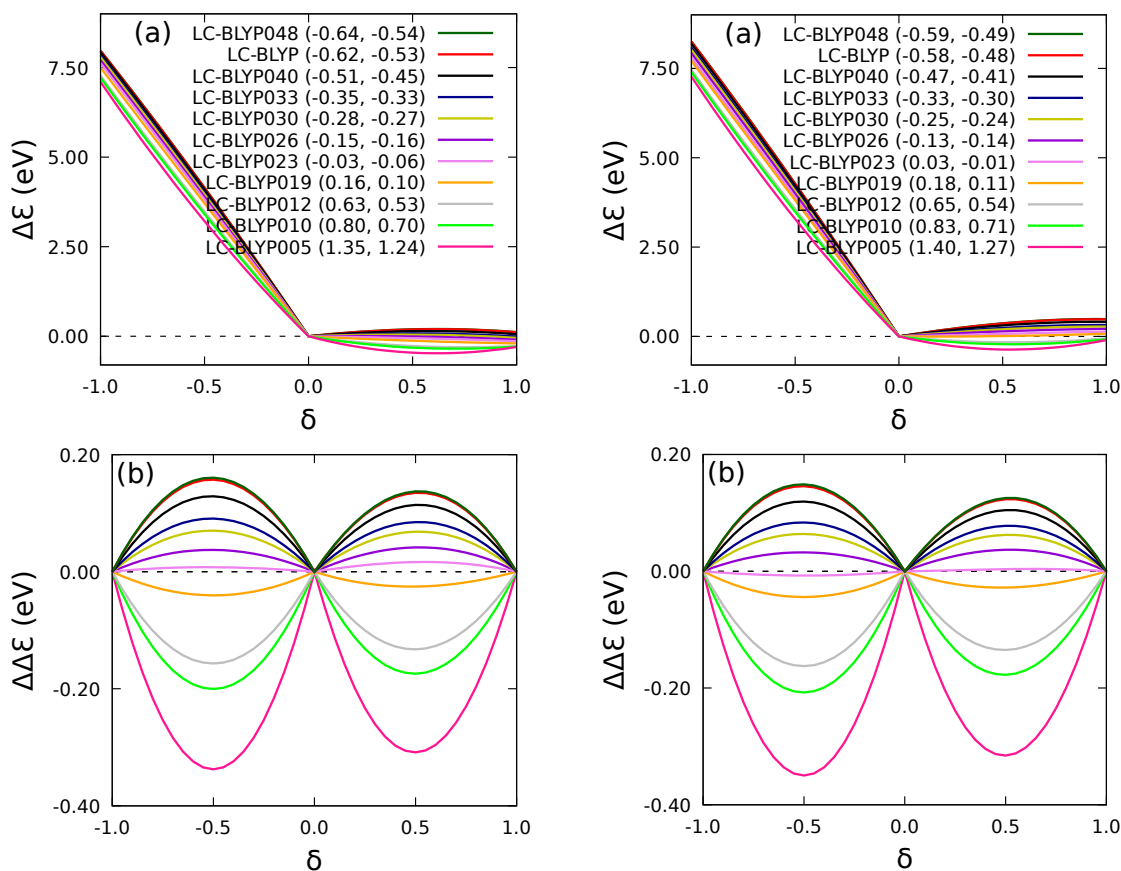

**FIG. S3.** For different values of  $\mu$  in the LC-BLYP XC functional, (a) electronic energy of *trans*-stilbene (left) and *cis*-stilbene (right) as a function of the fractional electron number ( $\delta$ ) where  $\delta = 0$  corresponds to the neutral system having  $\Delta\mathcal{E} = 0$ ; and (b)  $\Delta\Delta\mathcal{E}(\delta)$  deviation from the linear interpolation as a function of  $\delta$  for *trans*-stilbene (left) and *cis*-stilbene (right). The quantities in parentheses are the coefficients of the  $\delta^2$  term (eV), describing the curvature of the deviation, for the  $-1 \leq \delta \leq 0$  and  $0 \leq \delta \leq 1$  intervals. All calculations were carried out using the 6-311+G(d) basis set.

**TABLE S18.** Relative error on the second hyperpolarizabilities of *trans*-stilbene as a function of the average curvature coefficient (eV) as obtained at different levels of approximation. All DFT calculations were performed with the superfine integration grid.

| Methods          | Coefficients | Relative error on $\gamma_{//}$ | Relative error on $\gamma_{THS}$ | Relative error on $DR_{THS}$ |
|------------------|--------------|---------------------------------|----------------------------------|------------------------------|
| HF               | -1.00        | -31                             | -32                              | 2                            |
| SVWN             | 2.17         | 69                              | 84                               | -15                          |
| BLYP             | 1.98         | 77                              | 91                               | -14                          |
| PBE              | 2.02         | 71                              | 85                               | -14                          |
| B97-D            | 2.00         | 71                              | 85                               | -14                          |
| M06-L            | 1.97         | 42                              | 58                               | -19                          |
| B3LYP            | 1.50         | 38                              | 47                               | -12                          |
| PBE0             | 1.36         | 27                              | 35                               | -12                          |
| M06              | 1.36         | 26                              | 36                               | -14                          |
| M06-2X           | 0.70         | -1                              | 5                                | -11                          |
| M06-HF           | -0.42        | -24                             | -23                              | -3                           |
| M11              | -0.31        | -19                             | -15                              | -10                          |
| MN15             | 0.94         | 11                              | 16                               | -9                           |
| $\omega$ B97     | -0.51        | -21                             | -20                              | -5                           |
| $\omega$ B97X    | -0.38        | -15                             | -13                              | -4                           |
| $\omega$ B97X-D  | -0.11        | -4                              | -2                               | -6                           |
| LC- $\omega$ PBE | -0.53        | -24                             | -22                              | -7                           |
| CAM-B3LYP        | 0.44         | 1                               | 5                                | -8                           |
| LC-BLYP          | -0.58        | -25                             | -23                              | -6                           |
| LC-BLYP040       | -0.48        | -19                             | -18                              | -6                           |
| LC-BLYP033       | -0.34        | -12                             | -10                              | -5                           |
| LC-BLYP030       | -0.28        | -8                              | -6                               | -6                           |
| LC-BLYP026       | -0.16        | -0.5                            | 2                                | -6                           |
| LC-BLYP023       | -0.05        | 6                               | 9                                | -6                           |
| LC-BLYP019       | 0.13         | 17                              | 21                               | -7                           |
| LC-BLYP012       | 0.58         | 43                              | 50                               | -9                           |
| LC-BLYP010       | 0.75         | 52                              | 60                               | -10                          |
| LC-BLYP005       | 1.30         | 72                              | 84                               | -13                          |

**TABLE S19.** Relative error on the second hyperpolarizabilities of *cis*-stilbene as a function of the average curvature coefficient (eV) as obtained at different levels of approximation. All DFT calculations were performed with the superfine integration grid.

| Methods          | Coefficients | Relative error on $\gamma_{//}$ | Relative error on $\gamma_{THS}$ | Relative error on $DR_{THS}$ |
|------------------|--------------|---------------------------------|----------------------------------|------------------------------|
| HF               | -0.80        | -29                             | -31                              | 33                           |
| SVWN             | 2.12         | 43                              | 55                               | -44                          |
| BLYP             | 1.98         | 54                              | 64                               | -40                          |
| PBE              | 2.02         | 47                              | 58                               | -41                          |
| B97-D            | 2.55         | 47                              | 57                               | -41                          |
| M06-L            | 2.03         | 8                               | 19                               | -49                          |
| B3LYP            | 1.54         | 20                              | 26                               | -32                          |
| PBE0             | 1.39         | 9                               | 14                               | -31                          |
| M06              | 1.36         | 6                               | 12                               | -36                          |
| M06-2X           | 0.73         | -13                             | -10                              | -23                          |
| M06-HF           | -0.29        | -25                             | -25                              | 4                            |
| M11              | -0.17        | -28                             | -26                              | -18                          |
| MN15             | 0.97         | -1                              | 2                                | -21                          |
| $\omega$ B97     | -0.47        | -26                             | -26                              | 0                            |
| $\omega$ B97X    | -0.35        | -18                             | -18                              | 0                            |
| $\omega$ B97X-D  | -0.09        | -9                              | -8                               | -11                          |
| LC- $\omega$ PBE | -0.49        | -30                             | -30                              | -6                           |
| CAM-B3LYP        | 0.47         | -8                              | -6                               | -14                          |
| LC-BLYP          | -0.53        | -29                             | -29                              | 0.3                          |
| LC-BLYP040       | -0.44        | -24                             | -14                              | -1                           |
| LC-BLYP033       | -0.32        | -16                             | -16                              | -3                           |
| LC-BLYP030       | -0.25        | -12                             | -11                              | -5                           |
| LC-BLYP026       | -0.14        | -5                              | -4                               | -7                           |
| LC-BLYP023       | 0.10         | 2                               | 3                                | -9                           |
| LC-BLYP019       | 0.15         | 13                              | 15                               | -14                          |
| LC-BLYP012       | 0.60         | 36                              | 41                               | -26                          |
| LC-BLYP010       | 0.77         | 43                              | 49                               | -30                          |
| LC-BLYP005       | 1.34         | 53                              | 63                               | -38                          |

## 7. Solvent effects and frequency dispersion

### 7.1. Geometries and thermodynamic data

**TABLE S20.** Torsional angle (C2–C1–C3–C5, see Figure S2) and energies of *trans*- and *cis*-stilbene as calculated at the SMD//MP2/6-311G(d) level in different solvents. Enthalpy and free enthalpy were evaluated at 298.15 K. The values in parenthesis are the relative energies between the liquid and gas phases.

| <b>1,2-DCE</b>                  |                        |                      |                                        |
|---------------------------------|------------------------|----------------------|----------------------------------------|
|                                 | <i>trans</i> -stilbene | <i>cis</i> -stilbene | $\Delta E = E(c) - E(t)$<br>(kcal/mol) |
| Equilibrium torsional angle (°) | 24.6                   | 43.6                 | /                                      |
| Electronic energy (a.u.)        | -539.099740            | -539.096646          | 1.94 (1.07)                            |
| Enthalpy (H°, a.u.)             | -538.874999            | -538.871686          | 2.08 (1.07)                            |
| Free enthalpy (G°, a.u.)        | -538.926706            | -538.923253          | 2.17 (0.79)                            |
| <b>THF</b>                      |                        |                      |                                        |
| Equilibrium torsional angle (°) | 25.0                   | 43.6                 | /                                      |
| Electronic energy (a.u.)        | -539.0970961           | -539.094237          | 1.79 (0.92)                            |
| Enthalpy (H°, a.u.)             | -538.872290            | -538.869239          | 1.91 (0.90)                            |
| Free enthalpy (G°, a.u.)        | -538.923950            | -538.920797          | 1.98 (0.60)                            |
| <b>Chloroform</b>               |                        |                      |                                        |
| Equilibrium torsional angle (°) | 25.5                   | 43.5                 | /                                      |
| Electronic energy (a.u.)        | -539.099419            | -539.096583          | 1.78 (0.91)                            |
| Enthalpy (H°, a.u.)             | -538.874572            | -538.871556          | 1.89 (0.88)                            |
| Free enthalpy (G°, a.u.)        | -538.926216            | -538.923099          | 1.96 (0.58)                            |
| <b>Benzene</b>                  |                        |                      |                                        |
| Equilibrium torsional angle (°) | 25.5                   | 43.3                 | /                                      |
| Electronic energy (a.u.)        | -539.096795            | -539.094304          | 1.56 (0.69)                            |
| Enthalpy (H°, a.u.)             | -538.871824            | -538.869155          | 1.67 (0.66)                            |
| Free enthalpy (G°, a.u.)        | -538.923564            | -538.920639          | 1.84 (0.46)                            |

**TABLE S21.** Optimized key geometrical parameters [bond lengths (Å), bond angles (°)] for *trans*- and *cis*-stilbene calculated at the SMD(1,2-DCE)//MP2/6-311G(d) level. The values in parenthesis are the differences between the geometrical parameter in 1,2-dichloroethane and the ones in gas phase.

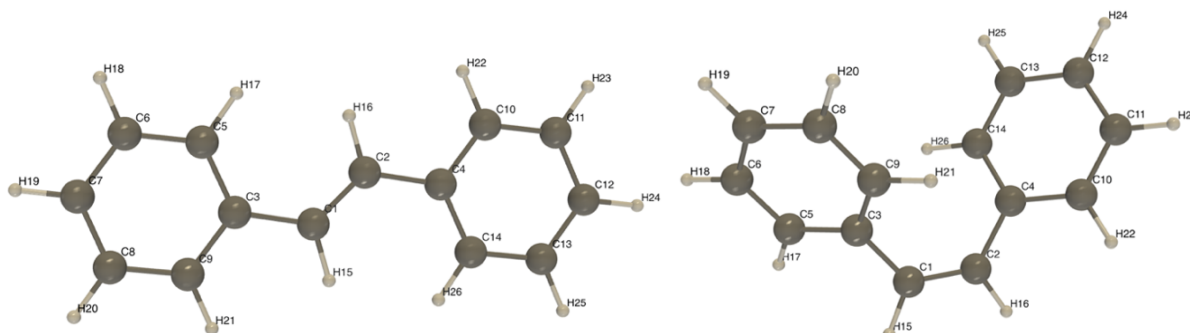

|             | <i>trans</i>   | <i>cis</i>    | bond length<br>difference,<br>$\Delta = d(t) - d(c)$ |
|-------------|----------------|---------------|------------------------------------------------------|
| C1—C2       | 1.355 (0.001)  | 1.354 (0.001) | 0.001                                                |
| C2—C4       | 1.469 (0.001)  | 1.477 (0.001) | -0.008                                               |
| C1—C3       | 1.469 (0.001)  | 1.477 (0.001) | -0.008                                               |
| C3—C5       | 1.410 (0.001)  | 1.407 (0.001) | 0.003                                                |
| C5—C6       | 1.397 (0.001)  | 1.399 (0.001) | -0.002                                               |
| C6—C7       | 1.401 (0.001)  | 1.400 (0.001) | 0.001                                                |
| C7—C8       | 1.400 (0.001)  | 1.401 (0.001) | -0.001                                               |
| C8—C9       | 1.398 (0.001)  | 1.398 (0.002) | 0.000                                                |
| C9—C3       | 1.409 (0.001)  | 1.409 (0.001) | 0.000                                                |
| C4—C10      | 1.409 (0.001)  | 1.407 (0.001) | 0.002                                                |
| C10—C11     | 1.398 (0.001)  | 1.399 (0.001) | -0.001                                               |
| C11—C12     | 1.400 (0.001)  | 1.400 (0.001) | 0.000                                                |
| C12—C13     | 1.401 (0.001)  | 1.401 (0.001) | 0.000                                                |
| C13—C14     | 1.397 (0.001)  | 1.398 (0.002) | -0.001                                               |
| C14—C4      | 1.410 (0.001)  | 1.409 (0.001) | 0.001                                                |
| C3—C5—C6    | 120.6 (-0.300) | 120.7 (0.00)  | /                                                    |
| C1—C3—C5    | 122.5 (3.00)   | 119.8 (-0.1)  | /                                                    |
| C2—C1—C3    | 124.8 (0.00)   | 126.2 (0.20)  | /                                                    |
| C2—C1—C3—C5 | 24.6 (-3.80)   | 43.6 (0.2)    | /                                                    |
| C4—C2—C1—C3 | 179.4 (0.20)   | 5.4 (-0.1)    | /                                                    |

**TABLE S22.** Optimized key geometrical parameters [bond lengths (Å), bond angles (°)] for *trans*- and *cis*-stilbene calculated at the SMD(THF)//MP2/6-311G(d) level. The values in parenthesis are the differences between the geometrical parameter in THF and the ones in gas phase.

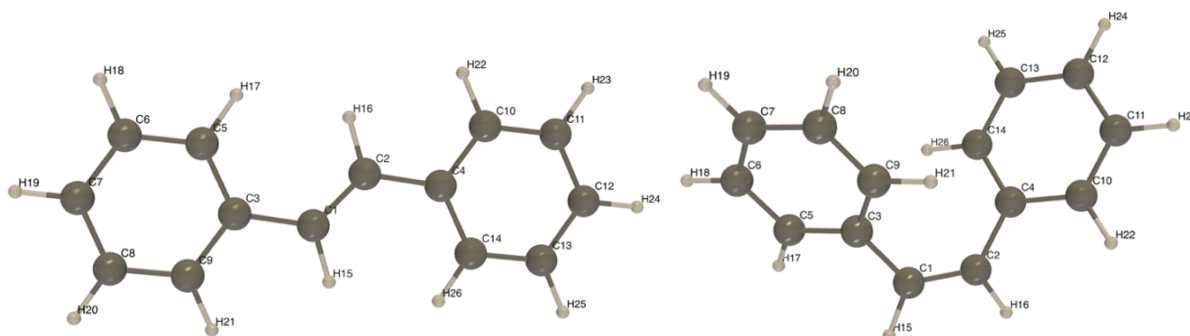

|             | <i>trans</i>   | <i>cis</i>    | bond length<br>difference,<br>$\Delta = d(t) - d(c)$ |
|-------------|----------------|---------------|------------------------------------------------------|
| C1—C2       | 1.355 (0.001)  | 1.354 (0.001) | 0.001                                                |
| C2—C4       | 1.469 (0.001)  | 1.476 (0.000) | -0.007                                               |
| C1—C3       | 1.469 (0.001)  | 1.476 (0.000) | -0.007                                               |
| C3—C5       | 1.410 (0.001)  | 1.407 (0.001) | 0.003                                                |
| C5—C6       | 1.397 (0.001)  | 1.399 (0.001) | -0.002                                               |
| C6—C7       | 1.401 (0.001)  | 1.400 (0.001) | 0.001                                                |
| C7—C8       | 1.400 (0.001)  | 1.401 (0.001) | -0.001                                               |
| C8—C9       | 1.398 (0.001)  | 1.398 (0.002) | 0.000                                                |
| C9—C3       | 1.409 (0.001)  | 1.408 (0.000) | 0.001                                                |
| C4—C10      | 1.409 (0.001)  | 1.407 (0.001) | 0.002                                                |
| C10—C11     | 1.398 (0.001)  | 1.399 (0.001) | -0.001                                               |
| C11—C12     | 1.400 (0.001)  | 1.400 (0.001) | 0.000                                                |
| C12—C13     | 1.401 (0.001)  | 1.401 (0.001) | 0.000                                                |
| C13—C14     | 1.397 (0.001)  | 1.398 (0.002) | -0.001                                               |
| C14—C4      | 1.410 (0.001)  | 1.408 (0.000) | 0.002                                                |
| C3—C5—C6    | 120.6 (-0.300) | 120.7 (0.00)  | /                                                    |
| C1—C3—C5    | 122.4 (2.90)   | 119.8 (-0.1)  | /                                                    |
| C2—C1—C3    | 124.8 (0.00)   | 126.2 (0.20)  | /                                                    |
| C2—C1—C3—C5 | 25.0 (-3.40)   | 43.6 (0.2)    | /                                                    |
| C4—C2—C1—C3 | 179.3 (0.10)   | 5.4 (-0.1)    | /                                                    |



**TABLE S23.** Optimized key geometrical parameters [bond lengths (Å), bond angles (°)] for *trans*- and *cis*-stilbene calculated at the SMD(chloroform)//MP2/6-311G(d) level. The values in parenthesis are the differences between the geometrical parameter in chloroform and the ones in gas phase.



|             | <i>trans</i>   | <i>cis</i>    | bond length<br>difference,<br>$\Delta = d(t) - d(c)$ |
|-------------|----------------|---------------|------------------------------------------------------|
| C1—C2       | 1.355 (0.001)  | 1.354 (0.001) | 0.001                                                |
| C2—C4       | 1.469 (0.001)  | 1.476 (0.000) | -0.007                                               |
| C1—C3       | 1.469 (0.001)  | 1.476 (0.000) | -0.007                                               |
| C3—C5       | 1.410 (0.001)  | 1.407 (0.001) | 0.003                                                |
| C5—C6       | 1.397 (0.001)  | 1.399 (0.001) | -0.002                                               |
| C6—C7       | 1.401 (0.001)  | 1.400 (0.001) | 0.001                                                |
| C7—C8       | 1.400 (0.001)  | 1.401 (0.001) | -0.001                                               |
| C8—C9       | 1.398 (0.001)  | 1.397 (0.001) | 0.001                                                |
| C9—C3       | 1.409 (0.001)  | 1.408 (0.000) | 0.001                                                |
| C4—C10      | 1.409 (0.001)  | 1.407 (0.001) | 0.002                                                |
| C10—C11     | 1.398 (0.001)  | 1.399 (0.001) | -0.001                                               |
| C11—C12     | 1.400 (0.001)  | 1.400 (0.001) | 0.000                                                |
| C12—C13     | 1.401 (0.001)  | 1.401 (0.001) | 0.000                                                |
| C13—C14     | 1.397 (0.001)  | 1.397 (0.001) | 0.000                                                |
| C14—C4      | 1.410 (0.001)  | 1.408 (0.000) | 0.002                                                |
| C3—C5—C6    | 120.9 (-0.600) | 120.7 (0.00)  | /                                                    |
| C1—C3—C5    | 122.2 (2.80)   | 119.8 (-0.1)  | /                                                    |
| C2—C1—C3    | 124.9 (0.10)   | 126.2 (0.20)  | /                                                    |
| C2—C1—C3—C5 | 25.5 (-2.90)   | 43.6 (0.2)    | /                                                    |
| C4—C2—C1—C3 | 179.3 (0.10)   | 5.4 (-0.1)    | /                                                    |

**TABLE S24.** Optimized key geometrical parameters [bond lengths (Å), bond angles (°)] for *trans*- and *cis*-stilbene calculated at the SMD(benzene)//MP2/6-311G(d) level. The values in parenthesis are the differences between the geometrical parameter in benzene and the ones in gas phase.

|             | <i>trans</i>   | <i>cis</i>    | bond length<br>difference,<br>$\Delta = d(t) - d(c)$ |
|-------------|----------------|---------------|------------------------------------------------------|
| C1—C2       | 1.354 (0.000)  | 1.353 (0.000) | 0.001                                                |
| C2—C4       | 1.468 (0.000)  | 1.476 (0.000) | -0.008                                               |
| C1—C3       | 1.468 (0.000)  | 1.476 (0.000) | -0.008                                               |
| C3—C5       | 1.409 (0.000)  | 1.407 (0.001) | 0.002                                                |
| C5—C6       | 1.397 (0.001)  | 1.398 (0.000) | -0.002                                               |
| C6—C7       | 1.400 (0.000)  | 1.399 (0.000) | 0.001                                                |
| C7—C8       | 1.399 (0.000)  | 1.401 (0.001) | -0.002                                               |
| C8—C9       | 1.397 (0.000)  | 1.397 (0.001) | 0.000                                                |
| C9—C3       | 1.409 (0.001)  | 1.408 (0.000) | 0.001                                                |
| C4—C10      | 1.409 (0.001)  | 1.407 (0.001) | 0.002                                                |
| C10—C11     | 1.397 (0.000)  | 1.398 (0.000) | -0.001                                               |
| C11—C12     | 1.399 (0.000)  | 1.399 (0.000) | 0.000                                                |
| C12—C13     | 1.400 (0.000)  | 1.401 (0.001) | -0.001                                               |
| C13—C14     | 1.397 (0.001)  | 1.397 (0.001) | 0.000                                                |
| C14—C4      | 1.409 (0.000)  | 1.408 (0.000) | 0.001                                                |
| C3—C5—C6    | 120.9 (-0.600) | 120.7 (0.00)  | /                                                    |
| C1—C3—C5    | 122.3 (2.70)   | 119.8 (-0.1)  | /                                                    |
| C2—C1—C3    | 124.9 (0.10)   | 126.3 (0.10)  | /                                                    |
| C2—C1—C3—C5 | 26.6 (-1.80)   | 43.3 (-0.1)   | /                                                    |
| C4—C2—C1—C3 | 179.2 (0.00)   | 5.4 (-0.1)    | /                                                    |

## 7.2. Second hyperpolarizabilities

Eq. (14) was widely-used to study the frequency dispersion of the  $\gamma_{//}$  and  $\gamma_{\perp}$  tensors.<sup>28,30–36</sup> Here, in addition to these quantities (Tables S26-S31 or FIGS. 8&9 and S4&S5), it was also applied to  $\gamma_{THS}$  whose expression is given by Eq. (S6). To do so, the rotational average  $\langle \gamma_{ZZZZ}^2 \rangle$  and  $\langle \gamma_{ZXXX}^2 \rangle$  quantities [Eqs. (S7) and (S8)] were estimated from the frequency-dependent dc-Kerr [ $\gamma_{ijkl}(-\omega; \omega, 0, 0)$ ] and EFISHG [ $\gamma_{ijkl}(-2\omega; \omega, \omega, 0)$ ] second hyperpolarizability tensor components. Then, the dynamic  $\gamma_{THS}$  was estimated (Table S32) and expressed as a power series in  $\omega_L^2$  [FIG. S6].

**TABLE S25:** Static second hyperpolarizability ( $10^3$  a.u.) and DR values as calculated at the SMD//CAM-B3LYP/6-311+G(d) level for *trans* and *cis* isomers, using the static ( $\epsilon_0$ ) and the optical ( $\epsilon_{\infty}$ ) relative dielectric constants for each solvent. *In vacuo* values are provided for comparison.

| Medium                       | $\epsilon_0$ |                     |               |                |                   | $\epsilon_{\infty}$ |                |                   |
|------------------------------|--------------|---------------------|---------------|----------------|-------------------|---------------------|----------------|-------------------|
|                              | $\epsilon_0$ | $\epsilon_{\infty}$ | $\gamma_{//}$ | $\gamma_{THS}$ | DR <sub>THS</sub> | $\gamma_{//}$       | $\gamma_{THS}$ | DR <sub>THS</sub> |
| <b><i>trans</i>-stilbene</b> |              |                     |               |                |                   |                     |                |                   |
| <i>in vacuo</i>              | 1.000        | 1.000               | 109.1         | 162.7          | 9.1               | 109.1               | 162.7          | 9.1               |
| <b>Benzene</b>               | 2.271        | 2.253               | 188.0         | 290.8          | 8.4               | 187.2               | 290.0          | 8.4               |
| <b>Chloroform</b>            | 4.711        | 2.091               | 252.6         | 393.7          | 8.3               | 183.9               | 284.9          | 8.4               |
| <b>THF</b>                   | 7.426        | 1.974               | 283.6         | 442.0          | 8.3               | 179.9               | 278.6          | 8.4               |
| <b>1,2-DCE</b>               | 10.125       | 2.087               | 301.1         | 469.1          | 8.3               | 186.5               | 289.5          | 8.4               |
| <b><i>cis</i>-stilbene</b>   |              |                     |               |                |                   |                     |                |                   |
| <i>in vacuo</i>              | 1.000        | 1.000               | 49.9          | 55.1           | 31.5              | 49.9                | 55.1           | 31.5              |
| <b>Benzene</b>               | 2.271        | 2.253               | 79.9          | 89.8           | 27.0              | 79.6                | 89.4           | 27.0              |
| <b>Chloroform</b>            | 4.711        | 2.091               | 106.5         | 119.5          | 26.5              | 76.7                | 86.1           | 27.0              |
| <b>THF</b>                   | 7.426        | 1.974               | 120.1         | 134.3          | 27.1              | 74.3                | 83.3           | 27.1              |
| <b>1,2-DCE</b>               | 10.125       | 2.087               | 128.0         | 142.9          | 27.3              | 76.5                | 85.8           | 27.0              |

**TABLE S26.** Gas phase dc-Kerr and EFISHG second hyperpolarizabilities ( $\gamma_{//}$ ) as a function of the frequency  $\omega$  (and of  $\omega_L^2$ ). The calculations were performed at the CAM-B3LYP/6-311+G(d) level using the superfine integration grid.

| $\omega$ (a.u.)       | $\omega_L^2$ (eV <sup>2</sup> ) | $\gamma_{//}(-\omega; \omega, \mathbf{0}, \mathbf{0})$ (a.u.) | $\omega_L^2$ (eV <sup>2</sup> ) | $\gamma_{//}(-2\omega; \omega, \omega, \mathbf{0})$ (a.u.) |
|-----------------------|---------------------------------|---------------------------------------------------------------|---------------------------------|------------------------------------------------------------|
| <i>trans-stilbene</i> |                                 |                                                               |                                 |                                                            |
| 0.00                  | 0.00                            | 109151                                                        | 0.00                            | 109151                                                     |
| 0.01                  | 0.15                            | 109935                                                        | 0.44                            | 111535                                                     |
| 0.02                  | 0.58                            | 112347                                                        | 1.75                            | 119230                                                     |
| 0.03                  | 1.31                            | 116566                                                        | 3.94                            | 134199                                                     |
| 0.04                  | 2.33                            | 122934                                                        | 7.00                            | 161172                                                     |
| 0.05                  | 3.65                            | 132006                                                        | 10.94                           | 212133                                                     |
| 0.06                  | 5.25                            | 144684                                                        | 15.75                           | 325103                                                     |
| 0.07                  | 7.14                            | 162441                                                        | 21.43                           | 703334                                                     |
| 0.08                  | 9.33                            | 187758                                                        | 27.99                           | -13284100                                                  |
| 0.09                  | 11.81                           | 225057                                                        | 35.43                           | -597571                                                    |
| 0.10                  | 14.58                           | 282825                                                        | 43.74                           | -735514                                                    |
| <i>cis-stilbene</i>   |                                 |                                                               |                                 |                                                            |
| 0.00                  | 0.00                            | 49936                                                         | 0.00                            | 49936                                                      |
| 0.01                  | 0.15                            | 50177                                                         | 0.44                            | 50666                                                      |
| 0.02                  | 0.58                            | 50913                                                         | 1.75                            | 52979                                                      |
| 0.03                  | 1.31                            | 52184                                                         | 3.94                            | 57316                                                      |
| 0.04                  | 2.33                            | 54070                                                         | 7.00                            | 64685                                                      |
| 0.05                  | 3.65                            | 56695                                                         | 10.94                           | 77413                                                      |
| 0.06                  | 5.25                            | 60253                                                         | 15.75                           | 101922                                                     |
| 0.07                  | 7.14                            | 65043                                                         | 21.43                           | 164512                                                     |
| 0.08                  | 9.33                            | 71560                                                         | 27.99                           | 697666                                                     |
| 0.09                  | 11.81                           | 80623                                                         | 35.43                           | -98741                                                     |
| 0.10                  | 14.58                           | 93708                                                         | 43.74                           | 14854                                                      |

**TABLE S27.** dc-Kerr and EFISHG second hyperpolarizabilities ( $\gamma_{//}$ ) as a function of the frequency  $\omega$  (and of  $\omega_L^2$ ). The calculations were performed at the SMD (1,2-dichloroethane)//CAM-B3LYP/6-311+G(d) level using the superfine integration grid.

| $\omega$ (a.u.)       | $\omega_L^2$ (eV <sup>2</sup> ) | $\gamma_{//}(-\omega; \omega, \mathbf{0}, \mathbf{0})$ (a.u.) | $\omega_L^2$ (eV <sup>2</sup> ) | $\gamma_{//}(-2\omega; \omega, \omega, \mathbf{0})$ (a.u.) |
|-----------------------|---------------------------------|---------------------------------------------------------------|---------------------------------|------------------------------------------------------------|
| <i>trans-stilbene</i> |                                 |                                                               |                                 |                                                            |
| 0.00                  | 0.00                            | 186514                                                        | 0.00                            | 186514                                                     |
| 0.01                  | 0.15                            | 188060                                                        | 0.44                            | 191222                                                     |
| 0.02                  | 0.58                            | 192826                                                        | 1.75                            | 206548                                                     |
| 0.03                  | 1.31                            | 201219                                                        | 3.94                            | 236966                                                     |
| 0.04                  | 2.33                            | 213997                                                        | 7.00                            | 293750                                                     |
| 0.05                  | 3.65                            | 232447                                                        | 10.94                           | 407948                                                     |
| 0.06                  | 5.25                            | 258698                                                        | 15.75                           | 695291                                                     |
| 0.07                  | 7.14                            | 296344                                                        | 21.43                           | 2158200                                                    |
| 0.08                  | 9.33                            | 351731                                                        | 27.99                           | -2767400                                                   |
| 0.09                  | 11.81                           | 436843                                                        | 35.43                           | 373837                                                     |
| 0.10                  | 14.58                           | 576556                                                        | 43.74                           | -1130790                                                   |
| <i>cis-stilbene</i>   |                                 |                                                               |                                 |                                                            |
| 0.00                  | 0.00                            | 76492                                                         | 0.00                            | 76492                                                      |
| 0.01                  | 0.15                            | 76904                                                         | 0.44                            | 77745                                                      |
| 0.02                  | 0.58                            | 78170                                                         | 1.75                            | 81736                                                      |
| 0.03                  | 1.31                            | 80361                                                         | 3.94                            | 89303                                                      |
| 0.04                  | 2.33                            | 83628                                                         | 7.00                            | 102385                                                     |
| 0.05                  | 3.65                            | 88212                                                         | 10.94                           | 125613                                                     |
| 0.06                  | 5.25                            | 94475                                                         | 15.75                           | 172437                                                     |
| 0.07                  | 7.14                            | 103015                                                        | 21.43                           | 303977                                                     |
| 0.08                  | 9.33                            | 114808                                                        | 27.99                           | 2938510                                                    |
| 0.09                  | 11.81                           | 131513                                                        | 35.43                           | -30245                                                     |
| 0.10                  | 14.58                           | 156206                                                        | 43.74                           | 141165                                                     |

**TABLE S28.** dc-Kerr and EFISHG second hyperpolarizabilities ( $\gamma_{//}$ ) as a function of the frequency  $\omega$  (and of  $\omega_L^2$ ). The calculations were performed at the SMD(Tetrahydrofuran)//CAM-B3LYP/6-311+G(d) level using the superfine integration grid.

| $\omega$ (a.u.)       | $\omega_L^2$ (eV <sup>2</sup> ) | $\gamma_{//}(-\omega; \omega, \mathbf{0}, \mathbf{0})$ (a.u.) | $\omega_L^2$ (eV <sup>2</sup> ) | $\gamma_{//}(-2\omega; \omega, \omega, \mathbf{0})$ (a.u.) |
|-----------------------|---------------------------------|---------------------------------------------------------------|---------------------------------|------------------------------------------------------------|
| <i>trans-stilbene</i> |                                 |                                                               |                                 |                                                            |
| 0.00                  | 0.00                            | 179854                                                        | 0.00                            | 179854                                                     |
| 0.01                  | 0.15                            | 181332                                                        | 0.44                            | 184352                                                     |
| 0.02                  | 0.58                            | 185884                                                        | 1.75                            | 198983                                                     |
| 0.03                  | 1.31                            | 193896                                                        | 3.94                            | 227976                                                     |
| 0.04                  | 2.33                            | 206084                                                        | 7.00                            | 281952                                                     |
| 0.05                  | 3.65                            | 223671                                                        | 10.94                           | 389965                                                     |
| 0.06                  | 5.25                            | 248656                                                        | 15.75                           | 658824                                                     |
| 0.07                  | 7.14                            | 284421                                                        | 21.43                           | 1969360                                                    |
| 0.08                  | 9.33                            | 336912                                                        | 27.99                           | -2857390                                                   |
| 0.09                  | 11.81                           | 417309                                                        | 35.43                           | 100971                                                     |
| 0.10                  | 14.58                           | 548647                                                        | 43.74                           | -1109140                                                   |
| <i>cis-stilbene</i>   |                                 |                                                               |                                 |                                                            |
| 0.00                  | 0.00                            | 74290                                                         | 0.00                            | 74290                                                      |
| 0.01                  | 0.15                            | 74688                                                         | 0.44                            | 75498                                                      |
| 0.02                  | 0.58                            | 75909                                                         | 1.75                            | 79345                                                      |
| 0.03                  | 1.31                            | 78020                                                         | 3.94                            | 86634                                                      |
| 0.04                  | 2.33                            | 81171                                                         | 7.00                            | 99221                                                      |
| 0.05                  | 3.65                            | 85582                                                         | 10.94                           | 121528                                                     |
| 0.06                  | 5.25                            | 91617                                                         | 15.75                           | 166356                                                     |
| 0.07                  | 7.14                            | 99829                                                         | 21.43                           | 291437                                                     |
| 0.08                  | 9.33                            | 111157                                                        | 27.99                           | 2577070                                                    |
| 0.09                  | 11.81                           | 127190                                                        | 35.43                           | -46934                                                     |
| 0.10                  | 14.58                           | 150858                                                        | 43.74                           | 122321                                                     |

**TABLE S29.** dc-Kerr and EFISHG second hyperpolarizabilities ( $\gamma_{//}$ ) as a function of the frequency  $\omega$  (and of  $\omega_L^2$ ). The calculations were performed at the SMD (Chloroform)//CAM-B3LYP/6-311+G(d) level using the superfine integration grid.

| $\omega$ (a.u.)       | $\omega_L^2$ (eV <sup>2</sup> ) | $\gamma_{//}(-\omega; \omega, \mathbf{0}, \mathbf{0})$ (a.u.) | $\omega_L^2$ (eV <sup>2</sup> ) | $\gamma_{//}(-2\omega; \omega, \omega, \mathbf{0})$ (a.u.) |
|-----------------------|---------------------------------|---------------------------------------------------------------|---------------------------------|------------------------------------------------------------|
| <i>trans-stilbene</i> |                                 |                                                               |                                 |                                                            |
| 0.00                  | 0.00                            | 183937                                                        | 0.00                            | 183937                                                     |
| 0.01                  | 0.15                            | 185453                                                        | 0.44                            | 188550                                                     |
| 0.02                  | 0.58                            | 190120                                                        | 1.75                            | 203552                                                     |
| 0.03                  | 1.31                            | 198333                                                        | 3.94                            | 233289                                                     |
| 0.04                  | 2.33                            | 210837                                                        | 7.00                            | 288672                                                     |
| 0.05                  | 3.65                            | 228872                                                        | 10.94                           | 399559                                                     |
| 0.06                  | 5.25                            | 254505                                                        | 15.75                           | 675781                                                     |
| 0.07                  | 7.14                            | 291208                                                        | 21.43                           | 2023880                                                    |
| 0.08                  | 9.33                            | 345088                                                        | 27.99                           | -2939800                                                   |
| 0.09                  | 11.81                           | 427645                                                        | 35.43                           | -84292                                                     |
| 0.10                  | 14.58                           | 562576                                                        | 43.74                           | -1154370                                                   |
| <i>cis-stilbene</i>   |                                 |                                                               |                                 |                                                            |
| 0.00                  | 0.00                            | 76670                                                         | 0.00                            | 76670                                                      |
| 0.01                  | 0.15                            | 77088                                                         | 0.44                            | 77930                                                      |
| 0.02                  | 0.58                            | 78353                                                         | 1.75                            | 81936                                                      |
| 0.03                  | 1.31                            | 80556                                                         | 3.94                            | 89535                                                      |
| 0.04                  | 2.33                            | 83839                                                         | 7.00                            | 102676                                                     |
| 0.05                  | 3.65                            | 88438                                                         | 10.94                           | 126018                                                     |
| 0.06                  | 5.25                            | 94729                                                         | 15.75                           | 173107                                                     |
| 0.07                  | 7.14                            | 103312                                                        | 21.43                           | 305606                                                     |
| 0.08                  | 9.33                            | 115157                                                        | 27.99                           | 3024220                                                    |
| 0.09                  | 11.81                           | 131948                                                        | 35.43                           | -526555                                                    |
| 0.10                  | 14.58                           | 156779                                                        | 43.74                           | 135869                                                     |

**TABLE S30.** dc-Kerr and EFISHG second hyperpolarizabilities ( $\gamma_{//}$ ) as a function of the frequency  $\omega$  (and of  $\omega_L^2$ ). The calculations were performed at the SMD (Benzene)//CAM-B3LYP/6-311+G(d) level using the superfine integration grid.

| $\omega$ (a.u.)       | $\omega_L^2$ (eV <sup>2</sup> ) | $\gamma_{//}(-\omega; \omega, \mathbf{0}, \mathbf{0})$ (a.u.) | $\omega_L^2$ (eV <sup>2</sup> ) | $\gamma_{//}(-2\omega; \omega, \omega, \mathbf{0})$ (a.u.) |
|-----------------------|---------------------------------|---------------------------------------------------------------|---------------------------------|------------------------------------------------------------|
| <i>trans-stilbene</i> |                                 |                                                               |                                 |                                                            |
| 0.00                  | 0.00                            | 187226                                                        | 0.00                            | 187226                                                     |
| 0.01                  | 0.15                            | 188761                                                        | 0.44                            | 191909                                                     |
| 0.02                  | 0.58                            | 193504                                                        | 1.75                            | 207147                                                     |
| 0.03                  | 1.31                            | 201849                                                        | 3.94                            | 237335                                                     |
| 0.04                  | 2.33                            | 214542                                                        | 7.00                            | 293497                                                     |
| 0.05                  | 3.65                            | 232854                                                        | 10.94                           | 405688                                                     |
| 0.06                  | 5.25                            | 258863                                                        | 15.75                           | 683602                                                     |
| 0.07                  | 7.14                            | 296073                                                        | 21.43                           | 2006940                                                    |
| 0.08                  | 9.33                            | 350648                                                        | 27.99                           | -3167350                                                   |
| 0.09                  | 11.81                           | 434137                                                        | 35.43                           | -433310                                                    |
| 0.10                  | 14.58                           | 570286                                                        | 43.74                           | -1220950                                                   |
| <i>cis-stilbene</i>   |                                 |                                                               |                                 |                                                            |
| 0.00                  | 0.00                            | 79609                                                         | 0.00                            | 79609                                                      |
| 0.01                  | 0.15                            | 80042                                                         | 0.44                            | 80928                                                      |
| 0.02                  | 0.58                            | 81372                                                         | 1.75                            | 85127                                                      |
| 0.03                  | 1.31                            | 83680                                                         | 3.94                            | 93096                                                      |
| 0.04                  | 2.33                            | 87120                                                         | 7.00                            | 106897                                                     |
| 0.05                  | 3.65                            | 91945                                                         | 10.94                           | 131469                                                     |
| 0.06                  | 5.25                            | 98552                                                         | 15.75                           | 181243                                                     |
| 0.07                  | 7.14                            | 107564                                                        | 21.43                           | 322702                                                     |
| 0.08                  | 9.33                            | 120025                                                        | 27.99                           | 3808980                                                    |
| 0.09                  | 11.81                           | 137713                                                        | 35.43                           | -46205                                                     |
| 0.10                  | 14.58                           | 163926                                                        | 43.74                           | 157867                                                     |



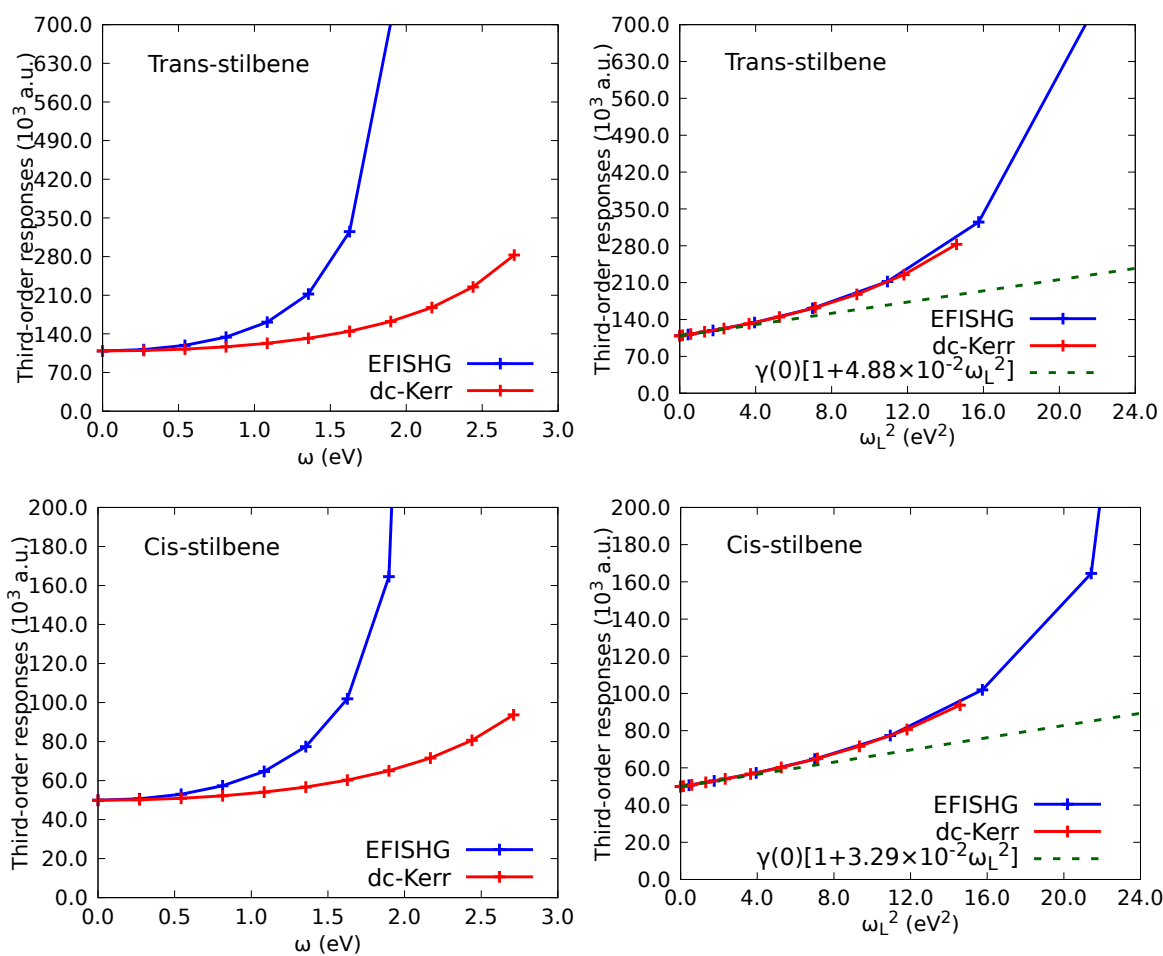

**FIG S4.** Gas phase TDDFT/CAM-B3LYP/6-311+G(d) dc-Kerr and EFISHG second hyperpolarizabilities ( $\gamma_{//}$ ) as a function of the frequency (left) and  $\omega_L^2$  (right) for *trans*-stilbene and *cis*-stilbene.

**TABLE S31.** dc-Kerr and EFISHG second hyperpolarizabilities ( $\gamma_{\perp}$ ) as a function of the frequency  $\omega$  (and of  $\omega_L^2$ ). The calculations were performed at the SMD (1,2-DCE)//CAM-B3LYP/6-311+G(d) level using the superfine integration grid.

| $\omega$ (a.u.)        | $\omega_L^2$ (eV <sup>2</sup> ) | $\gamma_{\perp}(-\omega; \omega, 0, 0)$ (a.u.) | $\omega_L^2$ (eV <sup>2</sup> ) | $\gamma_{\perp}(-2\omega; \omega, \omega, 0)$ (a.u.) |
|------------------------|---------------------------------|------------------------------------------------|---------------------------------|------------------------------------------------------|
| <i>trans</i> -stilbene |                                 |                                                |                                 |                                                      |
| 0.00                   | 0.00                            | 62172                                          | 0.00                            | 62172                                                |
| 0.01                   | 0.15                            | 62698                                          | 0.44                            | 63748                                                |
| 0.02                   | 0.58                            | 64322                                          | 1.75                            | 68880                                                |
| 0.03                   | 1.31                            | 67184                                          | 3.94                            | 79069                                                |
| 0.04                   | 2.33                            | 71544                                          | 7.00                            | 98099                                                |
| 0.05                   | 3.65                            | 77845                                          | 10.94                           | 136387                                               |
| 0.06                   | 5.25                            | 86823                                          | 15.75                           | 232759                                               |
| 0.07                   | 7.14                            | 99718                                          | 21.43                           | 723285                                               |
| 0.08                   | 9.33                            | 118719                                         | 27.99                           | -926057                                              |
| 0.09                   | 11.81                           | 147964                                         | 35.43                           | 213835                                               |
| 0.10                   | 14.58                           | 196057                                         | 43.74                           | -398071                                              |

$$\gamma_{\perp}(-\omega_{\sigma}; \omega_1, \omega_2, \omega_3) = 62.2 \times [1 + (5.90 \pm 0.01) \times 10^{-2} \times \omega_L^2 (\text{eV}^2) + \dots] \quad (\text{S18})$$

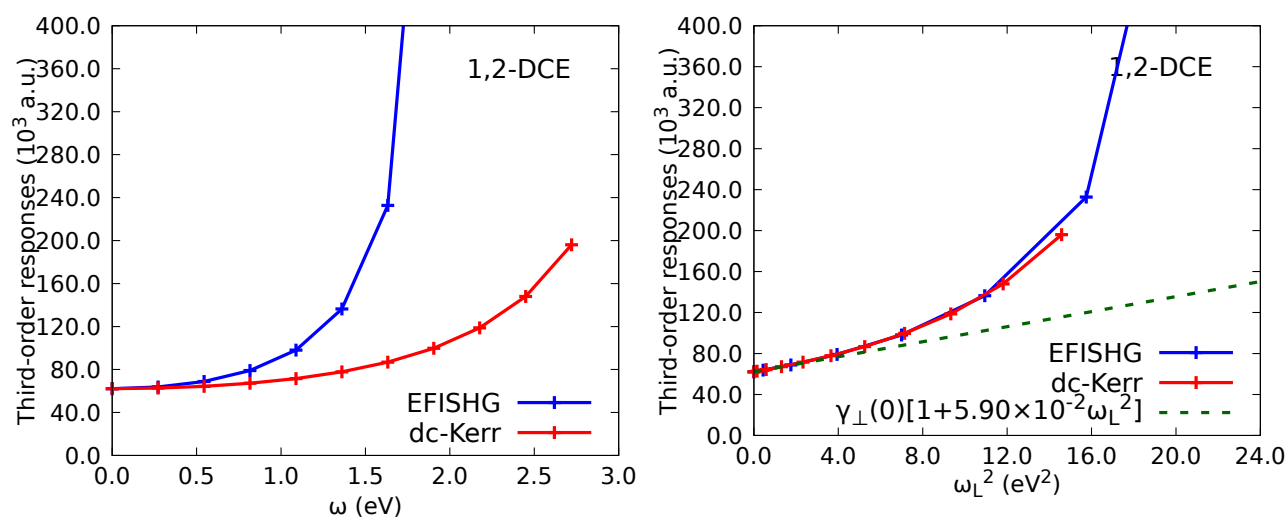

**FIG S5.** TDDFT/CAM-B3LYP/6-311+G(d) dc-Kerr and EFISHG second hyperpolarizabilities ( $\gamma_{\perp}$ ) as a function of the frequency (left) and  $\omega_L^2$  (right) for *trans*-stilbene in 1,2-DCE solvent medium.

**TABLE S32.** THS responses (a.u.) as obtained from the dynamic dc-Kerr and EFISHG second hyperpolarizability tensor components as a function of the frequency  $\omega$  (and of  $\omega_L^2$ ). The calculations were performed at the SMD (chloroform)//CAM-B3LYP/6-311+G(d) level using the superfine integration grid.

| $\omega$ (a.u.)       | $\omega_L^2$ (eV <sup>2</sup> ) | $\gamma_{THS}$ from $\gamma_{ijkl}(-\omega; \omega, \mathbf{0}, \mathbf{0})$ | $\omega_L^2$ (eV <sup>2</sup> ) | $\gamma_{THS}$ from $\gamma_{ijkl}(-2\omega; \omega, \omega, \mathbf{0})$ |
|-----------------------|---------------------------------|------------------------------------------------------------------------------|---------------------------------|---------------------------------------------------------------------------|
| <i>trans-stilbene</i> |                                 |                                                                              |                                 |                                                                           |
| 0.00                  | 0.00                            | 284932                                                                       | 0.00                            | 284932                                                                    |
| 0.01                  | 0.15                            | 287493                                                                       | 0.44                            | 292713                                                                    |
| 0.02                  | 0.58                            | 295383                                                                       | 1.75                            | 318086                                                                    |
| 0.03                  | 1.31                            | 309291                                                                       | 3.94                            | 368625                                                                    |
| 0.04                  | 2.33                            | 330515                                                                       | 7.00                            | 463424                                                                    |
| 0.05                  | 3.65                            | 361230                                                                       | 10.94                           | 654957                                                                    |
| 0.06                  | 5.25                            | 405057                                                                       | 15.75                           | 1137106                                                                   |
| 0.07                  | 7.14                            | 468095                                                                       | 21.43                           | 3516412                                                                   |
| 0.08                  | 9.33                            | 561096                                                                       | 27.99                           | 5325607                                                                   |
| 0.09                  | 11.81                           | 704354                                                                       | 35.43                           | 2055419                                                                   |
| 0.10                  | 14.58                           | 939765                                                                       | 43.74                           | 2239906                                                                   |

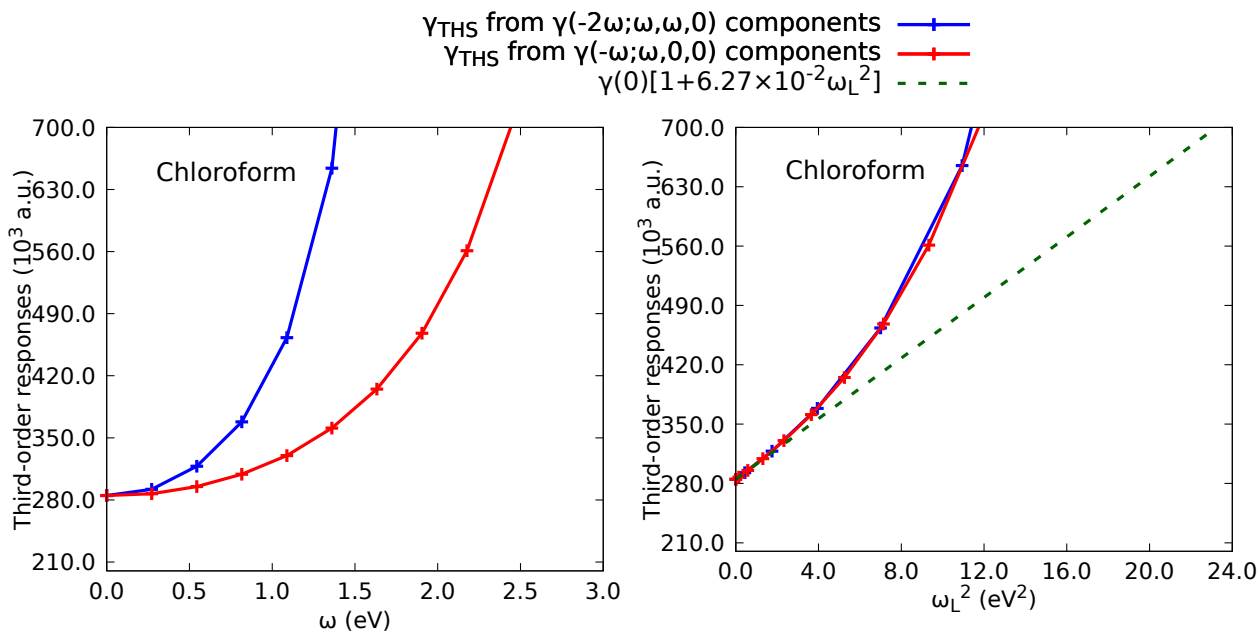

**FIG S6.** TDDFT/CAM-B3LYP/6-311+G(d) dc-Kerr and EFISHG second hyperpolarizabilities ( $\gamma_{THS}$ ) as a function of the frequency (left) and  $\omega_L^2$  (right) for *trans-stilbene* in chloroform solvent medium. The superposition of the dc-Kerr and EFISHG curves on the right-hand side figure demonstrates that the the Bishop-like polynomial expressions can also be applied to  $\gamma_{THS}$ .

$$\gamma_{THS}(-\omega_\sigma; \omega_1, \omega_2, \omega_3) = 284.9 \times 10^3 \times [1 + (6.27 \pm 0.02) \times 10^{-2} \times \omega_L^2(\text{eV}^2) + \dots] \quad (\text{S19})$$

### 7.3. Theoretical and computational aspects on the vibrational second hyperpolarizabilities

When invoking the clamped nucleus (CN) approximation,<sup>S39</sup> adopting Bishop and Kirtman perturbation theory method,<sup>S40,41</sup> and employing the double (electrical and mechanical) harmonic approximation (the zero-point vibrational average contribution is therefore neglected), the vibrational second hyperpolarizability reads

$$\gamma^{vib} = [\alpha^2]^0 + [\mu\beta]^0 \quad (S20)$$

where the tensor components of both quantities are:

$$[\alpha^2]_{ijkl}^0 = \frac{1}{8} \sum_{P_{-\sigma,1,2,3}} \sum_a \frac{\left(\frac{\partial \alpha_{ij}}{\partial Q_a}\right)_0 \left(\frac{\partial \alpha_{kl}}{\partial Q_a}\right)_0}{\omega_a^2 - (\omega_2^2 + \omega_3^2)} \quad (S21)$$

$$[\mu\beta]_{ijkl}^0 = \frac{1}{6} \sum_{P_{-\sigma,1,2,3}} \sum_a \frac{\left(\frac{\partial \mu_i}{\partial Q_a}\right)_0 \left(\frac{\partial \beta_{jkl}}{\partial Q_a}\right)_0}{(\omega_a^2 - \omega_\sigma^2)} \quad (S22)$$

$P_{-\sigma,1,2,3}$  is a summation over the 24 permutations of the pairs  $(\omega_\sigma, i)$ ,  $(\omega_1, j)$ ,  $(\omega_2, k)$  and  $(\omega_3, l)$ ,  $Q_a$  is the normal coordinate of the vibrational mode having circular frequency  $\omega_a$  (the  $a$  index runs over all the 3N-6 vibrational normal coordinates), the subscript 0 indicates that the derivatives are evaluated at nuclear configuration equilibrium, and the subscripts  $i, j, k, \dots$  stand for the Cartesian molecular axes x, y, z. Then, by applying the infinite optical frequency approximation,<sup>S42,43</sup> the dynamic vibrational second hyperpolarizabilities become frequency-independent and they can be written as simple multiple of their static counterparts:

$$\gamma^{vib}(-\omega; \omega, -\omega, \omega) = \frac{2}{3} [\alpha^2]_{\omega=0}^0 \quad (S23)$$

$$\gamma^{vib}(-2\omega; \omega, \omega, 0) = \frac{1}{4} [\mu\beta]_{\omega=0}^0 \quad (S24)$$

$$\gamma^{vib}(-3\omega; \omega, \omega, \omega) = 0 \quad (S25)$$

In this work, the geometrical derivatives of the static polarizability/first hyperpolarizability with respect to the atomic Cartesian coordinates were calculated by employing the finite distortion method in combination with Romberg's quadrature (distortion amplitude = 0.01 and 0.002 a.u. and one Romberg's iteration). In order to obtain the derivatives with respect to the vibrational normal mode coordinates, the derivatives with respect to the atomic Cartesian coordinates were projected over the normal coordinates. The Hessian required to compute the vibrational normal modes and frequencies were calculated analytically at the DFT level by using the coupled-perturbed Kohn–Sham (CPKS) scheme. The static polarizability/first hyperpolarizability calculations were performed with the CPKS//CAM-B3LYP XC functional. Solvent (1,2-dichloroethane, chloroform and tetrahydrofuran) effects were included by using IEFPCM.

## 7.4. Linear optical properties

**TABLE S33.** Vertical absorption wavelength ( $\lambda_{01}$ , nm), excitation energy ( $\Delta E_{01}$ , eV), and oscillator strength ( $f_{01}$ , dimensionless) of the dominant lowest-energy state of *trans*-stilbene as computed at the TDDFT//CAM-B3LYP/6-311+G(d) level *in vacuo* and in different solvents. The values in parentheses in the third and fourth column corresponds to the experimental maximum absorption values. These demonstrate very small solvatochromic effects. Note that the maximum absorption band in benzene corresponds to the so-called 0-1 vibronic transition whereas it is the 0-2 one in chloroform and in ethanol.

|                      | Transition [character (%)]                  | $\lambda_{01}$            | $\Delta E_{01}$ | $f_{01}$ |
|----------------------|---------------------------------------------|---------------------------|-----------------|----------|
| <i>In vacuo</i>      | S <sub>0</sub> →S <sub>1</sub> [H→L (0.96)] | 286                       | 4.32            | 0.870    |
| <b>Benzene</b>       | S <sub>0</sub> →S <sub>1</sub> [H→L (0.97)] | 301 (311 <sup>S37</sup> ) | 4.12 (3.99)     | 1.060    |
| <b>Chloroform</b>    | S <sub>0</sub> →S <sub>1</sub> [H→L (0.97)] | 309 (298 <sup>S37</sup> ) | 4.02 (4.16)     | 1.159    |
| <b>THF</b>           | S <sub>0</sub> →S <sub>1</sub> [H→L (0.97)] | 312                       | 3.97            | 1.196    |
| <b>1,2-DCE</b>       | S <sub>0</sub> →S <sub>1</sub> [H→L (0.97)] | 314 (298 <sup>S38</sup> ) | 3.95 (4.16)     | 1.216    |
| <b>Ethanol (95%)</b> |                                             | (295 <sup>S38</sup> )     | (4.20)          |          |

**TABLE S34.** Vertical absorption wavelengths ( $\lambda_{0i}$ , nm), excitation energies ( $\Delta E_{0i}$ , eV), and oscillator strengths ( $f_{0i}$ , dimensionless) of the two dominant lowest-energy states of the *cis*-stilbene as computed at the TDDFT//CAM-B3LYP/6-311+G(d) level *in vacuo* and different solvents. The last line reports experimental values of the absorption maximum, for comparison purpose.

|                        | Transition [character (%)]                    | $\lambda_{0i}$     | $\Delta E_{0i}$ | $f_{0i}$ |
|------------------------|-----------------------------------------------|--------------------|-----------------|----------|
| <b><i>In vacuo</i></b> | S <sub>0</sub> →S <sub>1</sub> [H→L (0.96)]   | 276                | 4.49            | 0.316    |
|                        | S <sub>0</sub> →S <sub>5</sub> [H-1→L (0.50)] | 216                | 5.74            | 0.310    |
| <b>Benzene</b>         | S <sub>0</sub> →S <sub>1</sub> [H→L (0.96)]   | 282                | 4.40            | 0.439    |
|                        | S <sub>0</sub> →S <sub>5</sub> [H-1→L (0.54)] | 219                | 5.66            | 0.506    |
| <b>Chloroform</b>      | S <sub>0</sub> →S <sub>1</sub> [H→L (0.96)]   | 285                | 4.35            | 0.512    |
|                        | S <sub>0</sub> →S <sub>5</sub> [H-1→L (0.57)] | 222                | 5.60            | 0.644    |
| <b>THF</b>             | S <sub>0</sub> →S <sub>1</sub> [H→L (0.97)]   | 28                 | 4.33            | 0.541    |
|                        | S <sub>0</sub> →S <sub>5</sub> [H-1→L (0.57)] | 223                | 5.57            | 0.709    |
| <b>1,2-DCE</b>         | S <sub>0</sub> →S <sub>1</sub> [H→L (0.96)]   | 287                | 4.32            | 0.558    |
|                        | S <sub>0</sub> →S <sub>5</sub> [H-1→L (0.57)] | 223                | 5.55            | 0.743    |
| <b>ethanol</b>         |                                               | 280 <sup>S38</sup> | 4.43            |          |
|                        |                                               | 224 <sup>S38</sup> | 5.54            |          |

## References

- S1 S. Ghosal, M. Samoc, P. N. Prasad and J. J. Tufariello, Optical nonlinearities of organometallic structures: aryl and vinyl derivatives of ferrocene, *J. Phys. Chem.*, 1990, **94**, 2847–2851.
- S2 D. V Vlasov, R. A. Garaev, V. V Korobkin and R. V Serov, Measurement of nonlinear polarizability of air, 1979, **2045**, 1033–1036.
- S3 Y. Shimoji, A. T. Fay, R. S. F. Chang and N. Djeu, Direct measurement of the nonlinear refractive index of air, *J. Opt. Soc. Am. B*, 1989, **6**, 1994.
- S4 D. M. Pennington, M. A. Hennesian and R. W. Hellwarth, Nonlinear index of air at 1.053  $\mu\text{m}$ , *Phys. Rev. A*, 1989, **39**, 3003–3009.
- S5 J. L. Brédas, C. Adant, P. Tackx, A. Persoons and B. M. Pierce, Third-Order Nonlinear Optical Response in Organic Materials: Theoretical and Experimental Aspects, *Chem. Rev.*, 1994, **94**, 243–278.
- S6 P. Tackx, M. Kauranen and A. Persoons, Determination of resonant and nonresonant third-order nonlinearities of organic molecules by phase-conjugate interferometry, *Opt. Lett.*, 1994, **19**, 1113.
- S7 D. M. Bishop, Molecular vibrational and rotational motion in static and dynamic electric fields, *Rev. Mod. Phys.*, 1990, **62**, 343–374.
- S8 L. L. Boyle, A. D. Buckingham, R. L. Disch and D. A. Dromor, Higher polarizability of the helium atom, *J. Chem. Phys.*, 1966, **45**, 1318–1323.
- S9 R. Tammer, K. Löblein, K. H. Peting and W. Hüttner, Field calibrated measurements of the dc Kerr constants of helium and molecular hydrogen, *Chem. Phys.*, 1992, **168**, 151–158.
- S10 D. P. Shelton and B. Rugar, The Kerr effect in hydrogen, *Chem. Phys. Lett.*, 1993, **201**, 364–368.
- S11 D. P. Shelton and J. E. Rice, Measurements and Calculations of the Hyperpolarizabilities of Atoms and Small Molecules in the Gas Phase, *Chem. Rev.*, 1994, **94**, 3–29.
- 12 R. Tammer and W. Hüttner, The anisotropy of the second hyperpolarizability of molecular hydrogen from the pressure and temperature dependence of the Kerr effect, *Chem. Phys.*, 1990, **146**, 155–163.
- S13 D. M. Bishop, 1998, pp. 1–40.
- S14 D. P. Shelton and J. E. Rice, Measurements and calculations of the hyperpolarizabilities of atoms and small molecules in the gas phase, *Chem. Rev.*, 1994, **94**, 3–29.
- S15 N. Van Steerteghem, K. Clays, T. Verbiest and S. Van Cleuvenbergen, Third-Harmonic Scattering for Fast and Sensitive Screening of the Second Hyperpolarizability in Solution, *Anal. Chem.*, 2017, **89**, 2964–2971.
- S16 V. Rodriguez, Polarization-Resolved Third-Harmonic Scattering in Liquids, *J. Phys. Chem. C*, 2017, **121**, 8510–8514.
- S17 D. L. Andrews and T. Thirunamachandran, On three-dimensional rotational averages, *J. Chem. Phys.*, 1977, **67**, 5026–5033.
- S18 J. S. Ford and D. L. Andrews, Molecular Tensor Analysis of Third-Harmonic Scattering in Liquids, *J. Phys. Chem. A*, 2018, **122**, 563–573.
- S19 P. Beaujean and B. Champagne, Coupled cluster evaluation of the second and third harmonic scattering responses of small molecules, *Theor. Chem. Acc.*, 2018, **137**, 50.
- S20 J. Autschbach and M. Srebro, Delocalization error and ‘functional tuning’ in Kohn-Sham calculations of molecular properties, *Acc. Chem. Res.*, 2014, **47**, 2592–2602.
- S21 E. R. Johnson, A. Otero-de-la-Roza and S. G. Dale, Extreme density-driven delocalization error for a model solvated-electron system, *J. Chem. Phys.*, 2013, **139**, 184116.
- S22 E. R. Johnson, P. Mori-Sánchez, A. J. Cohen and W. Yang, Delocalization errors in density functionals and implications for main-group thermochemistry, *J. Chem. Phys.*, 2008, **129**, 204112.
- S23 T. J. Duignan, J. Autschbach, E. Batista and P. Yang, Assessment of Tuned Range Separated

- Exchange Functionals for Spectroscopies and Properties of Uranium Complexes, *J. Chem. Theory Comput.*, 2017, **13**, 3614–3625.
- S24 A. K. Pal, T. J. Duignan and J. Autschbach, Calculation of linear and nonlinear optical properties of azobenzene derivatives with Kohn-Sham and coupled-cluster methods, *Phys. Chem. Chem. Phys.*, 2018, **20**, 7303–7316.
- S25 S. Nénon, B. Champagne and M. I. Spassova, Assessing long-range corrected functionals with physically-adjusted range-separated parameters for calculating the polarizability and the second hyperpolarizability of polydiacetylene and polybutatriene chains, *Phys. Chem. Chem. Phys.*, 2014, **16**, 7083–7088.
- S26 R. Zaleśny, M. Medved', S. P. Sitkiewicz, E. Matito and J. M. Luis, Can Density Functional Theory Be Trusted for High-Order Electric Properties? The Case of Hydrogen-Bonded Complexes, *J. Chem. Theory Comput.*, 2019, **15**, 3570–3579.
- S27 K. Garrett, X. Sosa Vazquez, S. B. Egri, J. Wilmer, L. E. Johnson, B. H. Robinson and C. M. Isborn, Optimum exchange for calculation of excitation energies and hyperpolarizabilities of organic electro-optic chromophores, *J. Chem. Theory Comput.*, 2014, **10**, 3821–3831.
- S28 K. S. Kaka, P. Beaujean, F. Castet and B. Champagne, A quantum chemical investigation of the second hyperpolarizability of p -nitroaniline, *J. Chem. Phys.*, 2023, **159**, 114104.
- S29 P. Besalú-Sala, S. P. Sitkiewicz, P. Salvador, E. Matito and J. M. Luis, A new tuned range-separated density functional for the accurate calculation of second hyperpolarizabilities, *Phys. Chem. Chem. Phys.*, 2020, **22**, 11871–11880.
- S30 D. P. Shelton, Hyperpolarizability dispersion measured for Kr and Xe, *J. Chem. Phys.*, 1985, **84**, 404–407.
- S31 D. M. Bishop, Dispersion Formulas for Certain Nonlinear Optical Processes, *Phys. Rev. Lett.*, 1988, **61**, 322–324.
- S32 D. M. Bishop, General dispersion formulae for atomic third-order non-linear optical properties, *Chem. Phys. Lett.*, 1988, **153**, 441–445.
- S33 D. M. Bishop, General dispersion formulas for molecular third-order nonlinear optical properties, *J. Chem. Phys.*, 1989, **90**, 3192–3195.
- S34 D. M. Bishop and D. W. De Kee, The frequency dependence of nonlinear optical processes, *J. Chem. Phys.*, 1996, **104**, 9876–9887.
- S35 D. M. Bishop and D. W. De Kee, The frequency dependence of hyperpolarizabilities for noncentrosymmetric molecules, *J. Chem. Phys.*, 1996, **105**, 8247–8249.
- S36 P. Beaujean and B. Champagne, Coupled cluster evaluation of the frequency dispersion of the first and second hyperpolarizabilities of water, methanol, and dimethyl ether, *J. Chem. Phys.*, 2016, **145**, 044311.
- S37 H. Suzuki, Relations between Electronic Absorption Spectra and Spatial Configurations of Conjugated Systems. XI Styrene, 1,1-Diphenylethylene and their Methylated Derivatives, *Bull. Chem. Soc. Jpn.*, 1960, **33**, 379–388.
- S38 A. P. Persoons, B. M. Van Wontergem and P. C. Tackx, in *Nonlinear Optics II*, eds. R. A. Fisher and J. F. Reintjes, SPIE, 1991, vol. 1409, p. 220.
- S39 D. M. Bishop, B. Kirtman and B. Champagne, Differences between the exact sum-over-states and the canonical approximation for the calculation of static and dynamic hyperpolarizabilities, *J. Chem. Phys.*, 1997, **107**, 5780–5787.
- S40 D. M. Bishop and B. Kirtman, A perturbation method for calculating vibrational dynamic dipole polarizabilities and hyperpolarizabilities, *J. Chem. Phys.*, 1991, **95**, 2646–2658.
- S41 D. M. Bishop and B. Kirtman, Compact formulas for vibrational dynamic dipole polarizabilities and hyperpolarizabilities, *J. Chem. Phys.*, 1992, **97**, 5255–5256.
- S42 D. M. Bishop, M. Hasan and B. Kirtman, A simple method for determining approximate static and dynamic vibrational hyperpolarizabilities, *J. Chem. Phys.*, 1995, **103**, 4157–4159.
- S43 D. S. Elliott and J. F. Ward, Vibrational mode contributions to molecular third order polarizabilities, *Mol. Phys.*, 1984, **51**, 45–63.
